1 Mutational burden of giant synaptic genes may be the cause of Alzheimer's disease

2 Sourena Soheili-Nezhad, MD<sup>1</sup>; Mojtaba Zarei, MD, PhD<sup>2</sup>

3 <sup>1</sup>Imaging Genetics Center, Mark and Mary Stevens Neuroimaging and Informatics Institute, Keck School of  
4 Medicine of USC, Marina del Rey, CA 90292

5 <sup>2</sup>School of Cognitive Sciences, Institute for Research in Fundamental Sciences, Tehran, Iran

6 S.S.

7 Imaging Genetics Center

8 USC Stevens Neuroimaging and Informatics Institute

9 Keck School of Medicine of USC

10 4676 Admiralty Way

11 Marina del Rey, CA 90292

12 Tel: (323) 44-BRAIN

13 sourena.soheili-nezhad@loni.ini.usc.edu

14 M.Z.

15 School of Cognitive Sciences

16 Institute for Research in Fundamental Sciences

17 PO 193955746

18 Tehran, Iran

19 Tel: +98 21

20 mz@ipm.ir

21

22

## 23 Abstract

24 All of the drug trials of the Alzheimer's disease (AD) have failed to slow progression of  
25 dementia in phase III studies, and the most effective therapeutic approach still remains  
26 controversial due to our incomplete understanding of AD pathophysiology. Amyloid beta ( $A\beta$ )  
27 and its cascade have been the primary focus of drug design efforts for more than a decade.  
28 However, mounting evidence indicates that mechanisms of AD etiopathogenesis are probably  
29 more complex than the previous reductionist models.

30 Several genome-wide association studies (GWAS) have recently shed light on dark aspects of  
31 AD from a hypothesis-free point of view. While the newly-identified AD risk genes rather raise  
32 more questions than they answer in deciphering the amyloid cascade, as a potentially overlooked  
33 finding, many of them code for receptors and transducers of cell adhesion signaling cascades.  
34 Remarkably, the hallmark genetic factors of AD, including the amyloid precursor protein (APP),  
35 presenilins (PSEN) and APOE also take part in highly similar pathways of cell adhesion  
36 regulation and coordinate contact-guidance of neuronal growth cones in brain development,  
37 albeit these  $A\beta$ -independent roles remain highly underexplored.

38 Here, we have revisited function of 27 AD risk genes in pathways of normal cell physiology. Our  
39 review clearly shows that a disrupted cell adhesion signaling nexus, rather than a protein  
40 aggregation process, is the central point of convergence in the unbiased genetic risk factors of  
41 AD. To further elucidate a potential relationship between aging and pathways of cell adhesion,  
42 we have conducted an exploratory bioinformatics analysis which revealed that *cell adhesion* is  
43 the most representative ontology of human genes larger than 500kb ( $p=8.0\times 10^{-13}$ ), and these  
44 extremely large genes are mostly expressed in brain ( $p=2.1\times 10^{-17}$ ) and selectively take part in  
45 synaptic composition ( $p=2.4\times 10^{-14}$ ). As possible driving forces of brain evolution, large genes  
46 may coordinate complex wiring of synaptic circuits in neurodevelopment, and we suggest that  
47 they may also be vulnerable to the impact of somatic mutations in aging due to their exceptional  
48 sizes which will be assessed by statistical models. An exemplar of this notion is the giant APOE  
49 receptor Lrp1b which is one of the most frequently deleted genes in various cancers and also  
50 represents the only brain-specific lipoprotein receptor. Our model, the *large gene instability*  
51 *hypothesis*, highlights alternate strategies for AD prevention, biomarker discovery and  
52 therapeutic design based on targeting genomic instability and synaptic adhesion.

53 **Keywords:** Alzheimer's disease; dementia pathogenesis; cell adhesion; integrin; focal adhesion  
54 kinase; DNA damage

55 **Abbreviations:** Alzheimer's disease (AD), Amyloid precursor protein (APP), Genome-wide  
56 association study (GWAS), Focal adhesion kinase (FAK), Postsynaptic density (PSD), Presenilin  
57 (PSEN), Src family kinase (SFK)

58

## 59 Introduction

60 More than a century has passed since the first report of a presenile dementia case by Alois  
61 Alzheimer<sup>1</sup>, and current molecular understanding of AD mostly borrows from identification of  
62 the A $\beta$  peptide as the main constituent of senile plaques and subsequent discovery of APP and  
63 PSEN mutations in rare cases of familial AD<sup>2,3</sup>. These observations were compiled to the  
64 amyloid cascade hypothesis in the pre-genomic era, a theory which implicates A $\beta$  species,  
65 proteinous aggregates and neurofibrillary tangles as the driving force of dementia with broad  
66 influence as the central model of AD etiopathogenesis<sup>4</sup>.

67 Nevertheless, due to various methodological difficulties, A $\beta$  species has hardly been validated as  
68 a causal force of neurodegeneration in AD patients. Despite receiving support from preclinical  
69 studies, manipulating the pathways of A $\beta$  generation and clearance has also yielded  
70 disappointing results in several clinical trials so far<sup>5</sup>. While a handful of clinical failures do not  
71 necessarily disprove a theory *per se*, overemphasis on a single disease model is a dangerous  
72 gamble and could be one of the many explanations for the lack of progress in AD therapeutic  
73 design<sup>6</sup>. Accuracy of the amyloid cascade hypothesis is a topic of ongoing debate, and it goes  
74 without saying that this theory may be rejected in future<sup>7-12</sup>, a critical possibility warranting  
75 development of alternate disease models for interpreting exploratory evidence including recent  
76 high-throughput genomic findings.

77 In contrast to the classical hallmarks of AD including senile plaques and neurofibrillary tangles  
78 that are still of questionable etiological significance<sup>13</sup>, genetic risk factors temporally precede  
79 earliest stages of brain development, aging, and neurodegeneration, and are expected to inform  
80 on causal disease pathways. The genetic architecture of common sporadic AD is highly complex,  
81 and a number of susceptibility loci have been identified by genome-wide association studies  
82 (GWAS) in large elderly populations. These novel genetic factors provide unbiased insight into  
83 molecular and cellular mechanisms of AD<sup>14-19</sup> but their mechanistic interpretation has been under  
84 powerful influence of the amyloid cascade theory so far.

85 This report serves to provide an evidence-based framework for compiling pathways of AD  
86 predisposition from an A $\beta$ -independent point of view. The rest of this manuscript is organized as  
87 follows; in the first section, we aim to revisit the role of AD risk genes in pathways of normal  
88 cell physiology. We show that 27 disease-related genes strongly converge to common pathways  
89 of cell-extracellular adhesion signaling and brain circuit development. In the second section, we  
90 will try to explain interaction of aging as the strongest risk factor of senile dementias with the  
91 genetic landscape of AD. Finally, several testable predictions are provided for assessment of our  
92 new disease model.

### 93 1.1 The APP family proteins are highly-conserved cell adhesion molecules

94 Derailed catabolism of the APP protein and generation of an aggregation-prone A $\beta$  species  
95 abstract a significant proportion of molecular investigations in AD, leading to efforts to block  
96 this cascade by means of A $\beta$  immunotherapies or design of secretase inhibitors<sup>5</sup>. In contrast,

97 three decades after successful cloning of the APP gene<sup>20</sup> the physiological role of its protein  
98 product remains less investigated and may be the real key to understanding disease mechanisms.

99 APP codes for a transmembrane protein and is highly expressed in the developing brain at the  
100 site of neuronal growth cones, structures that form motile tips of outgrowing axons and  
101 dendrites<sup>21</sup>. The A $\beta$  peptide enhances interaction of developing neurites with extracellular  
102 adhesion molecules and promotes outgrowth of neuronal projections<sup>22,23</sup>. The full-length and  
103 membrane-tethered form of APP also interacts with extracellular laminin, heparan sulfate,  
104 fibronectin and collagen<sup>24-26</sup>, molecules which form the backbone of extra-cellular matrix and  
105 moderate contact-guidance of growth cones in synaptic circuit formation.

106 Interaction of APP with heparan sulfate<sup>27</sup> and laminin<sup>24</sup> stimulates assembly of hippocampal  
107 connections and promote neurite outgrowth<sup>28</sup>. In the other hand, antisense-downregulation of  
108 APP inhibits extension of axons and dendrites<sup>29</sup>. APP demonstrates a dose effect in growth cone  
109 guidance<sup>30</sup> and its increased dosage in Down syndrome results in emergence of faster advancing  
110 growth cones with promoted adhesive properties and larger sizes<sup>31</sup>. In contrast, knockdown of  
111 the APP gene in zebrafish disrupts outgrowth of developing neurites<sup>32</sup>. Intriguingly, although  
112 wild-type human APP can rescue this defective phenotype, the mutated APP of familial AD fails  
113 to substitute for normal function of animal gene<sup>32</sup>.

114 Several cellular pathways are speculated to mediate the neurite-promoting effects of APP in  
115 neurodevelopment. The netrin pathway of neurite guidance incorporates APP as a co-receptor<sup>33</sup>,  
116 and inactivation of APP disrupts netrin signaling and diminishes axonal outgrowth<sup>34</sup>. APP also  
117 binds reelin, which is a large extracellular adhesion molecule for guidance and migration of  
118 neurons<sup>35</sup>. In this context, interaction of reelin with APP promotes outgrowth of hippocampal  
119 neurites<sup>35</sup>. Functional interaction of APP and reelin requires presence of a third cell adhesion  
120 molecule,  $\alpha$ 3 $\beta$ 1-integrin, as well<sup>35</sup>. Integrins are the main component of focal adhesions and  
121 known to co-localize with the APP protein<sup>36,37</sup> at dynamic neuronal adhesion sites<sup>38</sup>. Intriguingly,  
122 integrin modulates neurite outgrowth by interacting with APP<sup>39</sup>. Similarly, integrin also acts as  
123 an accessory reelin receptor for cell adhesion regulation and neuronal migration<sup>40-42</sup>. Therefore,  
124 APP, integrin, reelin (and its counterpart APOE receptors) may take part in surface adhesion  
125 ligand/receptor complexes for transduction of coherent signals.

126 In addition to growth cone navigating, APP also moderates spatial migration of neurons in  
127 neurodevelopment<sup>43</sup>. Triple-knockout of the APP family genes results in neuronal migration  
128 defects similar to human lissencephaly<sup>44</sup> and two candidate ligands for APP, including pancortin  
129 and lingo1, orchestrate migration of neural precursor cells<sup>45-47</sup>. From a cellular and molecular  
130 point of view, pathways of growth cone navigation and cell migration are highly similar, as both  
131 of these events rely on specialized membrane protrusions, namely filopodia and lamellipodia for  
132 cell reshaping and anchorage. These plastic cell organizations sense the directional gradients of  
133 extracellular contact-guidance cues by means of surface adhesion receptors including integrins.  
134 Intracellularly, filopodial adhesion receptors affect rearrangement of the actin cytoskeleton for  
135 changing cell polarity and recycling focal adhesion turnover towards the protruding end and  
136 powering cell movement<sup>48</sup>.

137 Mounting evidence indicates that the cytoskeletal system is an important point of convergence in  
138 signaling through the APP protein. Transmembrane APP is selectively localized to the  
139 cytoskeletal-rich regions of neuronal growth cones at dynamic adhesion sites<sup>38,49</sup>, and the APP  
140 intracellular domain (AICD) which is released after  $\gamma$ -secretase-mediated cleavage affects  
141 rearrangement of the cellular actin cytoskeleton<sup>50</sup>. The AICD cleavage fragment of APP interacts  
142 with a number of intracellular signal transducers, including Fe65, Tip60, KAI1, DISC1, Dab1,  
143 X11, and Grb2 that have been identified to date<sup>51-53</sup>. Intriguingly, all of these transducers  
144 influence pathways of cytoskeletal rearrangement and affect cell movement:

- 145 • Fe65 and Tip60 affect the cytoskeletal system and moderate cancer cell migration<sup>54</sup>.
- 146 • KAI1 suppresses cancer cell migration by affecting cytoskeletal assembly<sup>55,56</sup>.
- 147 • DISC1 coordinates remodeling of the actin cytoskeleton in migrating neurons and growth  
148 cone-like protrusions<sup>57</sup>. This protein rescues neuronal migration defects caused by loss of  
149 APP<sup>51</sup>.
- 150 • Dab1 is a mandatory adaptor of the APOE receptors in the reelin pathway and controls  
151 cytoskeletal remodeling in neuronal migration<sup>58</sup>.
- 152 • X11 is a recently-discovered modulator of the reelin pathway and affects cell  
153 movement<sup>59</sup>.
- 154 • Grb2 is an adaptor molecule that links various receptors including integrin with  
155 intracellular pathways of cytoskeletal plasticity and regulates cancer cell migration<sup>60,61</sup>.

156 In accordance with the common function of these putative signal transducers, The APP family  
157 genes similarly affect migration and invasion of various cancer cells by affecting the cytoskeletal  
158 pathway<sup>62,63</sup>. Interestingly, the key cytoskeletal regulator Rac1 controls expression of the APP  
159 gene by a feedback-like mechanism in primary hippocampal neurons<sup>64</sup>.

160 Since the early stages of nervous system evolution, the APP paralogue of *Drosophila* (APPL) has  
161 promoted neuronal migration<sup>65</sup>. Phylogenetic evolution of the APP family genes reveals that cell  
162 adhesion is the most consistent biological function of this family<sup>66</sup>. From an evolutionary point  
163 of view, the cytoplasmic tail of APP is probably of utmost importance, as it comprises a super-  
164 conserved NPxY amino acid motif in the form of <sub>682</sub>YENPTY<sub>687</sub> that has remained unchanged  
165 from roundworms to humans for more than 900 million years of evolution<sup>67</sup>. This consensus  
166 motif is known to mediate endocytic sorting of receptors and, perhaps more importantly, their  
167 interaction with tyrosine-phosphorylated intracellular signal transducers<sup>68</sup>. Two intracellular  
168 adaptors of APP with established signaling roles, including Dab1 and Fe65, interact with this  
169 APP motif in a phosphorylation-dependent manner<sup>69,70</sup>. The <sub>682</sub>Tyr residue of this APP motif  
170 undergoes phosphorylation and is essential to induction of synaptogenesis<sup>71</sup>. Of note, the  
171 consensus NPxY motif is also present in the cytoplasmic tail of all APOE receptors and activates  
172 the mandatory Dab1 adaptor of reelin pathway<sup>72</sup>.

173 In addition to playing physiological roles in neurodevelopment, the APP protein is evidenced to  
174 maintain its function in mature neurons. Mouse hippocampal neurons express the APP protein  
175 under physiological conditions<sup>73</sup>, and APP is present in close association with NMDA glutamate  
176 receptors that are central to memory-formation. In this context, APP maintains NMDA receptors  
177 at postsynaptic membrane and promotes neurotransmission<sup>74,75</sup>. Through its conserved NPxY

178 motif, APP also interacts with the postsynaptic scaffold protein AIDA-1<sup>76</sup>, which is a protein for  
179 regulating hippocampal synaptic transmission and plasticity<sup>77</sup>. Loss of the APP family genes  
180 disrupts synaptic function<sup>78</sup>, memory formation<sup>79</sup>, and causes an aging-related synaptic loss in  
181 mice<sup>80,81</sup>. Further supporting physiological roles in synaptic adhesion, the three APP family  
182 members (APP, APLP1, APLP2) form trans-synaptic adhesive dimers<sup>82</sup>, and cleavage of the  
183 APP protein changes synaptic adhesion and assembly<sup>83</sup>. Lastly, APP mutations are shown to  
184 disrupt this regulatory effect<sup>84</sup>. An exhaustive review of the APP protein in pathways of normal  
185 cell physiology is beyond the scope of this manuscript and the interested reader is referred to  
186 recent publications<sup>85-87</sup>.

## 187 1.2 The $\gamma$ -secretase complex is a membrane-tethered enzyme for signaling of cell 188 adhesion receptors

189 PSEN1 and PSEN2 genes code for catalytic subunits of the transmembrane  $\gamma$ -secretase enzyme  
190 and various mutations in these genes cause autosomal-dominant AD. Since cleavage of the APP  
191 protein by  $\gamma$ -secretase is a mandatory step for A $\beta$  generation, accelerated catabolism of APP in  
192 the amyloidogenic pathway is considered the mechanism of AD development in individuals with  
193 mutated PSEN genes, a hypothesis which has been extrapolated to common sporadic AD as well.

194 Unexpectedly, PSEN mutations of familial AD were recently found to cause an almost complete  
195 loss of  $\gamma$ -secretase function<sup>88</sup> and reduce generation of the putatively-neurotoxic A $\beta$ <sub>40</sub>, A $\beta$ <sub>42</sub> and  
196 A $\beta$ <sub>43</sub> species occasionally to undetectable levels<sup>89,90</sup>. In further contradiction, knock-in mice  
197 harboring the mutated PSEN1 gene of familial AD are phenotypically similar to knockout strains  
198 which lack  $\gamma$ -secretase function, and both of these strains demonstrate impaired hippocampal  
199 plasticity<sup>91</sup>. This line of evidence suggests a loss-of-function mechanism for PSEN mutations of  
200 familial AD, and potentially explain the paradoxical worsening of cognitive function and  
201 accelerated brain atrophy in  $\gamma$ -secretase inhibitor trials of AD<sup>92,93</sup>.

202 In contrast to the narrow focus on detailed pathways of APP catabolism, unbiased proteomic  
203 profiling has revealed that the  $\gamma$ -secretase complex has a broad spectrum of substrate specificity  
204 for cell surface receptors with signaling roles<sup>94,95</sup>. For instance, the  $\gamma$ -secretase enzyme cleaves  
205 the APOE/reelin receptors<sup>96</sup>, as well as DSG2, TREM2 and ephrin receptors which are all coded  
206 by AD risk genes<sup>94,97,98</sup>. A candidate gene of familial AD, Notch3<sup>99</sup>, is mandatorily cleaved by  $\gamma$ -  
207 secretase prior to signaling<sup>100</sup>. Loss of  $\gamma$ -secretase results in erroneous axonal pathfinding due to  
208 derailed netrin signaling<sup>101</sup>, and has also been shown to disrupt cell adhesion force generation<sup>102</sup>.  
209 While it is difficult to pinpoint a particular signaling path that mediates detrimental effects of  $\gamma$ -  
210 secretase dysfunction in familial AD, it is tempting to speculate pathways of synaptic adhesion  
211 and contact-guidance in its etiopathogenesis.

212 Recent nanoscale microscopy reveals that expression of the  $\gamma$ -secretase complex is selectively  
213 enriched in postsynaptic compartments during normal synaptic maturation<sup>103</sup>. A  
214 neurophysiological role for  $\gamma$ -secretase is further supported by observing that this enzyme  
215 interacts with a number of synaptic adhesion molecules including  $\delta$ -catenin and N-cadherin, as  
216 well as glutamate receptors<sup>103,104</sup>. Cleavage activity of  $\gamma$ -secretase modulates synaptic

217 transmission and adhesive properties<sup>104</sup> and this neuromodulatory effect is disrupted by familial  
218 AD mutations<sup>105</sup>.

### 219 1.3 The APOE/Lipoprotein receptor pathway coordinates contact-guidance of 220 neurites

221 APOE4 is the strongest genetic risk factor of sporadic AD and explains ~6 percent of the risk of  
222 disease development<sup>106</sup>. In contrast, the only observed correlation of the APP locus with sporadic  
223 AD has been recently reported in a large Icelandic cohort, showing that a rare protective variant,  
224 A673T, explains less than 0.6 percent of the risk of sporadic AD<sup>107</sup>. This variant does not  
225 contribute to the risk of AD in the North American population<sup>108</sup>, and its statistical significance  
226 ( $p=4.8\times 10^{-7}$ ) would not have survived a similarly-powered genome-wide scan. Curiously,  
227 mechanistic interpretation of the APOE4 risk isoform still mostly borrows from putative  
228 influences on APP catabolism and A $\beta$  clearance, and normal function of the APOE protein has  
229 received less attention.

230 The APOE molecule moderates transport of lipoprotein particles in various organs by binding to  
231 the family of lipoprotein receptors. Although lipoprotein receptors aid in uptake and metabolism  
232 of lipid particles, they are not simple cargo transporters, and can activate a comprehensive nexus  
233 of intracellular second messengers with specialized signaling roles<sup>109</sup>. In this context, lipoprotein  
234 receptors including APOEr2 and VLDLr are well established regulators of brain development in  
235 reelin signaling. Activation of these two receptors by reelin triggers phosphorylation of the  
236 intracellular Dab1 adaptor. This pathway affects various aspects of cell physiology, among  
237 which cytoskeletal remodeling and neuronal migration are mainstay<sup>110</sup>. The reelin pathway  
238 guides extension of hippocampal neurites<sup>111</sup> and coordinates outgrowth of the perforant path  
239 which represents the major input to hippocampal formation<sup>112</sup>.

240 The APOE molecule shares its lipoprotein receptors with reelin<sup>113</sup>, and mounting evidence  
241 indicates that APOE undertakes a similar role in guiding outgrowth of developing neurites<sup>113-117</sup>.  
242 Moreover, the neurite promoting effect of APOE is isoform-dependent, with the APOE3 isoform  
243 being a more potent inducer of neuritic outgrowth than APOE4<sup>115,117</sup>.

244 Intracellular transducers of the APOE molecule remain less investigated in neurons, but have  
245 been explored in other cells. In macrophages, APOE activates major transducers of the reelin  
246 pathway including Dab1 and PI3K<sup>118</sup>. In vascular pericytes, the APOE molecule affects  
247 rearrangement of the actin cytoskeleton and its knockdown deranges normal cell migration<sup>119</sup>.  
248 Similar to vascular cells, the APOE isoforms also affect the proteomic signature of cytoskeletal  
249 regulators in peripheral nerves<sup>120</sup>. Taken together, this body of evidence suggests that APOE  
250 may signal through a reelin-like pathway and influence cytoskeletal assembly, neurite outgrowth  
251 and cell movement.

252 In addition to the APOE risk locus and the reelin gene which is correlated with AD  
253 neuropathology in postmortem human brains<sup>121</sup>, three novel AD susceptibility loci further  
254 implicate lipoprotein receptors and a reelin-like signaling pathway in this disease; F-spondin  
255 (Spon1) is correlated with rate of cognitive decline in AD and also modulates white matter

256 microstructure in healthy humans<sup>122,123</sup>. This gene codes for a reelin domain-containing cell  
257 adhesion molecule and its ortholog localizes to integrin adhesion sites in *C. elegans*<sup>124</sup>. F-spondin  
258 also binds APOEr2<sup>125</sup> and guides extension of hippocampal neurites<sup>126</sup>. Moreover, F-spondin  
259 interacts with the APP protein<sup>127</sup>, and this interaction serves to activate signaling of the reelin  
260 adaptor Dab1 in ganglion cells<sup>128</sup>. Two other AD risk loci including Sorl1<sup>129,130</sup> and CLU  
261 respectively code for a lipoprotein receptor and a lipoprotein receptor ligand. Sorl1 regulates cell  
262 migration<sup>130,131</sup> and CLU activates reelin transducers including Dab1 and PI3K/Akt in  
263 neurons<sup>132</sup>.

264 Perhaps unrelated to their roles in lipid metabolism, lipoprotein receptors take part in the  
265 architecture of postsynaptic structures by interacting with the major synaptic scaffold protein  
266 PSD95<sup>133-135</sup> as well as neurotransmitter receptors<sup>133,135</sup>. Expression of lipoprotein receptors  
267 affect synaptic density in hippocampal and cortical neurons<sup>136</sup>, and their activation by reelin  
268 promotes synaptic plasticity<sup>137-139</sup>. Intriguingly, lipoprotein receptors share several intercellular  
269 transducers with the APP protein, including X11, Dab1, Fe65<sup>136,140</sup> and also control  
270 transcriptional activation of the APP gene in the cell nucleus<sup>141</sup>.

#### 271 1.4 AD susceptibility loci strongly converge to cell adhesion pathways

272 Familial AD which is caused by APP or PSEN mutations constitutes less than one percent of AD  
273 cases. In contrast, the true polygenic landscape of common sporadic AD has been partly  
274 uncovered by recent genome-wide association studies<sup>14-19</sup>. Remarkably, the majority of novel  
275 AD risk genes engage in pathways of cell adhesion, migration and contact-guidance:

- 276 • **DSG2** (Desmoglein-2, rs8093731) is a component of cell adhesion complexes. DSG2  
277 gene product serves focal adhesion roles and regulates cytoskeletal assembly by  
278 interacting with  $\beta$ 8-integrin in endothelial cells<sup>142</sup>. DSG2 also controls cell motility and  
279 its depletion affects migration of malignant melanoma cells<sup>143</sup>.
- 280 • **EPHA1** (rs11771145) codes for a member of the ephrin-A receptor family that controls  
281 neurite adhesion and guidance. EPHA1 also moderates cell migration through integrin-  
282 linked kinase and the cytoskeletal remodeling pathway<sup>144,145</sup>, and affects invasion and  
283 metastasis of colorectal cancer cells<sup>146</sup>.
- 284 • **FRMD4A**<sup>147</sup> and **FERMT2** (Kindlin-2, rs17125944) code for two members of the  
285 FERM domain family linking integrin and focal adhesion kinase (FAK) with the  
286 intracellular actin cytoskeleton<sup>148,149</sup>. FERMT2 transduces cell adhesion signals and is  
287 engaged in malignant cell invasion<sup>150</sup>.
- 288 • **GAB2** (rs2373115), one of the earliest AD susceptibility genes to be discovered by  
289 GWAS<sup>14,151</sup>, encodes a scaffolding protein acting downstream to the integrin signaling  
290 pathway. GAB2 regulates adhesion and migration of hematopoietic cells<sup>152</sup> and also  
291 controls cytoskeletal remodeling for migration of malignant breast cancer cells<sup>153</sup>.
- 292 • **CASS4** (Hep1, rs7274581) controls focal cell adhesion<sup>154</sup> and the CAS family members  
293 take part in axon guidance by interacting with integrin<sup>155</sup>. CASS4 also affects  
294 reorganization of the cytoskeleton and moderates cancer cell invasion<sup>154,156</sup>.



- 295 • **CD2AP** (rs10948363) codes for an actin cytoskeleton binding protein<sup>157</sup>. CD2AP  
296 regulates focal adhesion of kidney podocytes at contact sites by linking membrane  
297 adhesion complexes with the intracellular actin cytoskeleton<sup>158</sup>.
- 298 • **PTK2B** (Pyk2, rs28834970) is a focal adhesion signal transducer and affects the cellular  
299 cytoskeleton<sup>159,160</sup>. PTK2B controls integrin-dependent migration of T-cells<sup>161</sup> and  
300 promotes invasion of malignant glioma cells<sup>162</sup>.
- 301 • **PICALM** (rs10792832) is a Clathrin adaptor protein and engages in membrane receptor  
302 trafficking<sup>163</sup>. Clathrin regulates endocytosis of synaptic vesicles and moderates  
303 trafficking of the glutamate receptors<sup>164</sup>. Unbiased gene-gene interaction analysis in AD  
304 has revealed that the PICALM locus interacts with DOCK1<sup>165</sup>, which is an actin  
305 cytoskeleton regulator and affects cell movement<sup>166</sup>.
- 306 • **INPP5D** (SHIP-1, rs35349669) is a key modulator of the PI3K pathway. This protein  
307 regulates platelet adhesion by modulating integrin signaling<sup>167</sup> and also coordinates  
308 movement of neutrophils in response to focal contact and adhesion<sup>168</sup>.
- 309 • **NYAP1** (rs1476679) codes for a signal transducer of the PI3K pathway. NYAP1 acts  
310 downstream to Contactin5 synaptic adhesion molecule and controls cytoskeletal  
311 remodeling in neurite outgrowth<sup>169</sup>. Of note, Contactin5 binds amyloid precursor-like  
312 protein 1<sup>170</sup>.
- 313 • **Amphysin II** (BIN1, rs6733839) codes for a protein that binds the cytoplasmic tail of  
314 integrin<sup>171</sup> and neuronal focal adhesion kinase<sup>172</sup> and is therefore probably involved in  
315 integrin-dependent cell adhesion. Moreover, Amphysin I which has a high level of  
316 sequence similarity (71%) with this gene product regulates outgrowth of hippocampal  
317 neurites<sup>173</sup> and links endocytosis mechanisms to pathways of actin cytoskeleton  
318 remodeling<sup>174</sup>.
- 319 • **UNC5C**<sup>175</sup> (rs137875858) codes for a receptor of the netrin pathway of axon guidance<sup>176</sup>.  
320 In addition to the noted interaction of netrin1 with the APP protein, the netrin pathway  
321 also incorporates  $\alpha 3\beta 1$ -integrin and Down Syndrome Cell Adhesion Molecule (DSCAM)  
322 in neuronal migration and neurite outgrowth, respectively<sup>177,178</sup>.
- 323 • **TPBG**, a recently discovered AD risk gene<sup>19</sup>, modulates cell adhesion and  
324 movement<sup>179,180</sup>. TPBG localizes at focal adhesion sites in kidney podocytes and affects  
325 formation of actin stress fibers for cell remodeling<sup>181</sup>. Deletion of TPBG disrupts  
326 cadherin-dependent cell adhesion and suppresses cell migration<sup>182</sup>.
- 327 • **HBEGF**<sup>19</sup> (rs11168036) encodes a protein that promotes integrin-dependent cell  
328 adhesion<sup>183</sup>. HBEGF also regulates focal adhesion kinase and moderates cell migration  
329 by affecting the actin cytoskeleton<sup>184</sup>.
- 330 • **USP6NL**<sup>19</sup> (RNTRE, rs7920721) modulates integrin signaling and controls focal  
331 adhesion turnover, thereby acting as a "brake" in cell migration<sup>185</sup>.
- 332 • **TREM2** (rs75932628), a novel AD locus identified by next-generation sequencing<sup>186</sup>, is  
333 known to interact with the plexin-A1 adhesion molecule<sup>187</sup> which is a receptor of axon  
334 guidance. The TREM and plexin-A1 interaction is suggested to moderate cell adhesion  
335 and movement through the cytoskeletal pathway<sup>188</sup>. The Plexin pathway also opposes  
336 integrin signal and inhibits cell movement<sup>189</sup>.

- 337 • **TTC3**, a novel familial late-onset AD locus, maps to the Down syndrome critical  
338 region<sup>190</sup>. TTC3 modulates  $\beta$ 1-integrin signaling in cancer cells<sup>191</sup> and its increased level  
339 affects assembly of the actin cytoskeleton and disrupts neurite extension<sup>192</sup>.
- 340 • **PLCG2**<sup>193</sup> (rs72824905) encodes a phospholipase enzyme which is activated by integrin  
341 and moderates cell migration<sup>194</sup>. PLCG2 activation controls adhesion of leukocytes and  
342 takes place downstream to integrin signaling<sup>195</sup>.
- 343 • **ABI3**<sup>193</sup> (rs616338) affects the cytoskeletal pathway and participates in formation of  
344 membrane protrusions for cell motility<sup>196</sup>. Its binding partner, the ABI3 binding protein,  
345 interacts with integrin at focal adhesion sites and suppresses malignant cell  
346 migration<sup>197,198</sup>.

347 Taken together, the genetic architecture of AD strongly implicates various cell adhesion  
348 receptors which coordinate pathways of cytoskeletal plasticity and cell reshaping. Further aiding  
349 in formulation of a unified disease model, many of these gene products cross-talk with the  
350 integrin pathway, and this convergence spotlights the A $\beta$ -independent roles of APP and  $\gamma$ -  
351 secretase in cell adhesion signaling and synapse formation.

## 352 2 The hypothesis

353 Our model builds on the unbiased genetic architecture of AD and puts the cell adhesion signaling  
354 pathway at the center of disease nexus. Various cell adhesion regulators including integrins  
355 coordinate cell migration, neurite elongation, and assembly of synaptic circuits in brain  
356 development, and also undertake pivotal roles in maintaining synaptic integrity and homeostasis  
357 after completion of brain development<sup>199</sup>. Specifically, cell adhesion molecules form a dense  
358 scaffold at the postsynaptic density (PSD) sites and connect neurotransmitter receptors and  
359 synaptic ion channels with the actin cytoskeleton as well as the extracellular matrix. In addition  
360 to such mechanical support, synaptic adhesion molecules also act as biochemical sensors for  
361 modulation of postsynaptic plasticity, dendritic spine reshaping, and recycling of transmitter  
362 receptors<sup>200</sup>. For instance, it has been shown that enhancing signaling of synaptic integrin by  
363 application of its agonist peptide modulates neurotransmission<sup>201</sup> in a dose-dependent manner<sup>202</sup>.

364 In this context, integrin promotes budding of filopodia which serve to strengthen synaptic  
365 connections by cytoskeletal plasticity mechanisms<sup>203</sup>, i.e. the same mechanism by which  
366 integrins control axonal adhesion and pathfinding during brain development<sup>204</sup>. Remarkably,  
367 many of the intracellular transducers recruited by focal adhesion cascades also act as molecular  
368 switches of synaptic plasticity, including various tyrosine kinases (SFK, PI3K and Akt) as well  
369 as the calcium signaling pathway<sup>205</sup>.

370 The post-developmental roles of cell adhesion pathways in synaptic function and plasticity,  
371 which is not limited to integrins (Fig. 1), may enlighten pathways of AD from an A $\beta$ -  
372 independent perspective. We propose that the heritable component of AD is defined by several  
373 genetic factors that coordinate robust adhesion and assembly of synaptic circuits in brain  
374 development. This genetic landscape also defines the level of synaptic adhesion, integrity and  
375 circuit resilience in the post-developmental period, and individuals with a vulnerable genetic

376 background may suffer disassembly of neural circuits due to loss of synaptic adhesion pathways  
377 in late life.

378

379

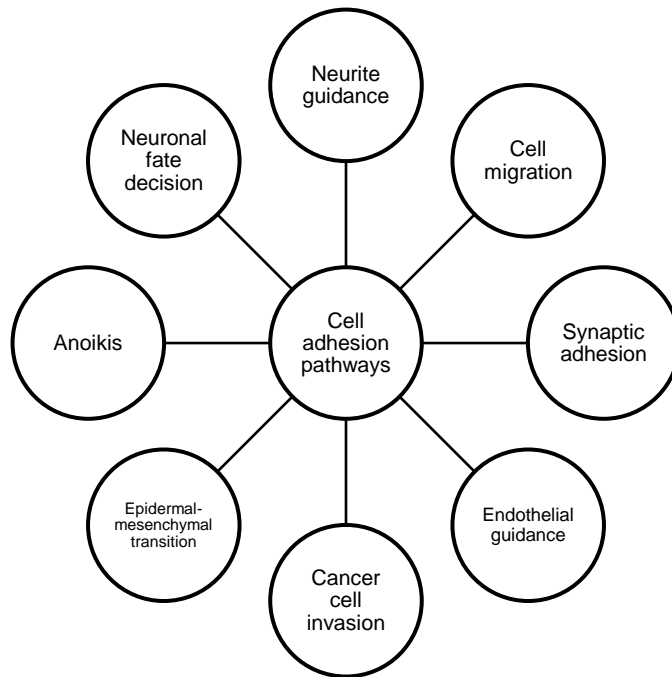

380

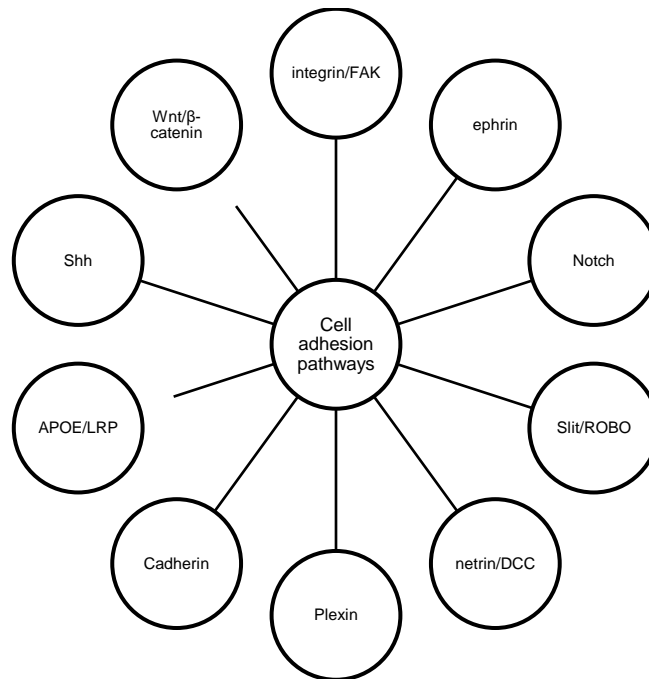

381

382

383 Figure 1. Top: Biological adhesion pathways transfer microenvironmental signals across the cell  
384 membrane, and affect cell polarity, movement and survival. Bottom: Various pathways of  
385 extracellular adhesion coordinate rearrangement of the actin cytoskeleton and thereby control  
386 reshaping of membrane protrusions for movement. FAK: focal adhesion kinase; LRP: lipoprotein  
387 receptor; Shh: Sonic hedgehog.

### 388 3 Aging and the Alzheimer's disease

389 Human aging is the strongest risk factor for dementia, but etiology of its correlation with AD  
390 remains elusive. One possibility is that AD may represent a continuation of global aging process,  
391 and cellular disruptions which happen in “normal” aging may give rise to dementia when  
392 accelerated<sup>7</sup>. An elegant work has recently revealed that frontal cortex cells of healthy humans  
393 accumulate ~37 new point mutations each year<sup>206</sup>. In line with the DNA damage hypothesis of  
394 aging, loss of genomic integrity has been previously implicated in AD predisposition<sup>12,207,208</sup>.

395 From a statistical point of view, even if a purely-random and stochastic process causes 37 annual  
396 mutations in aging neurons, larger genes are expected to be disproportionately affected in late  
397 life. Considering the low rate of somatic mutations estimated in aging frontal cortex cells  
398 ( $5.7 \times 10^{-9}$  mutations/bp.year<sup>206</sup>), only near one percent of the copies of a median-sized human  
399 gene will be affected by at least one somatic mutation in a 65-year individual. However, in sharp  
400 contrast, the largest known human gene, CNTNAP2, which is more than 80x larger than a  
401 median-sized protein-coding locus and codes for a synaptic adhesion molecule, is expected to be  
402 highly vulnerable to somatic mutations, and only 42 percent of its copies are estimated to remain  
403 intact at the same age (Fig. 3). This high variability is due to the characteristic distribution of  
404 human gene size parameter, which spans three-orders of magnitude with a long tail  
405 encompassing a subset of extremely large genes (Fig. 2). Intriguingly, many of the largest known  
406 human genes map to chromosomal fragile sites<sup>209</sup>.

407

408

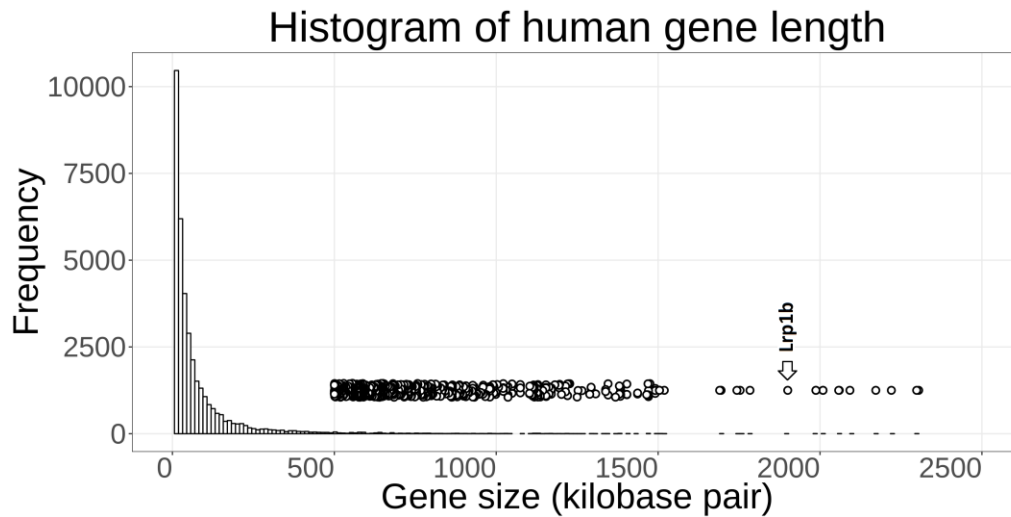

409

410

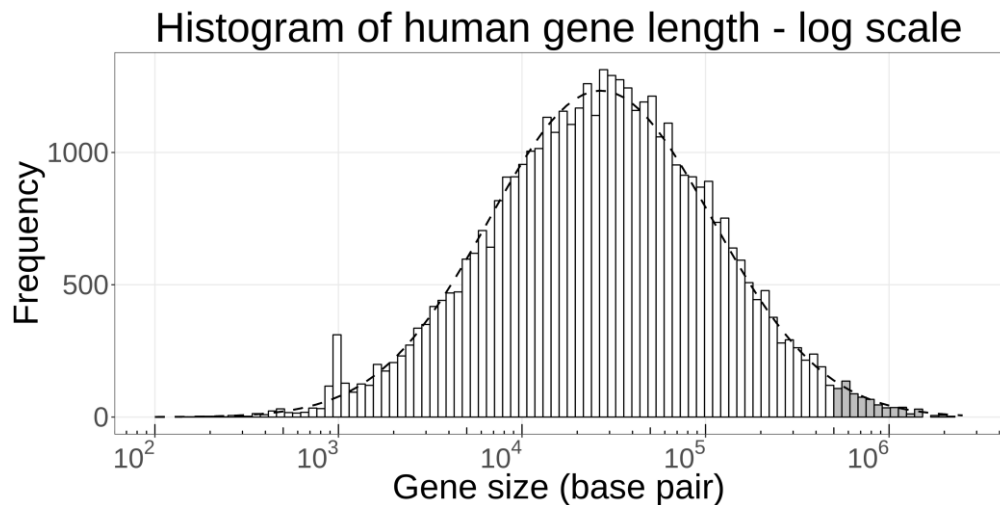

411

412 Figure 2. **Top:** Human gene length distribution has a long tail that extends towards a group of  
413 extremely-large genes in the megabase pair range. The arrow points to the giant APOE receptor,  
414 Lrp1b. **Bottom:** Human gene size parameter closely follows a log-normal distribution with  
415 parameters  $\mu=\ln(26.9\text{kbp})$  and  $\sigma=1.4$ . The outlier bin near 1kbp represents the large family of  
416 olfactory receptors which have gone through extreme evolutionary expansion. Scattered circles  
417 (**top**) and grey bars (**bottom**) show the subset of large genes used in functional enrichment  
418 analyses (>500kbp).

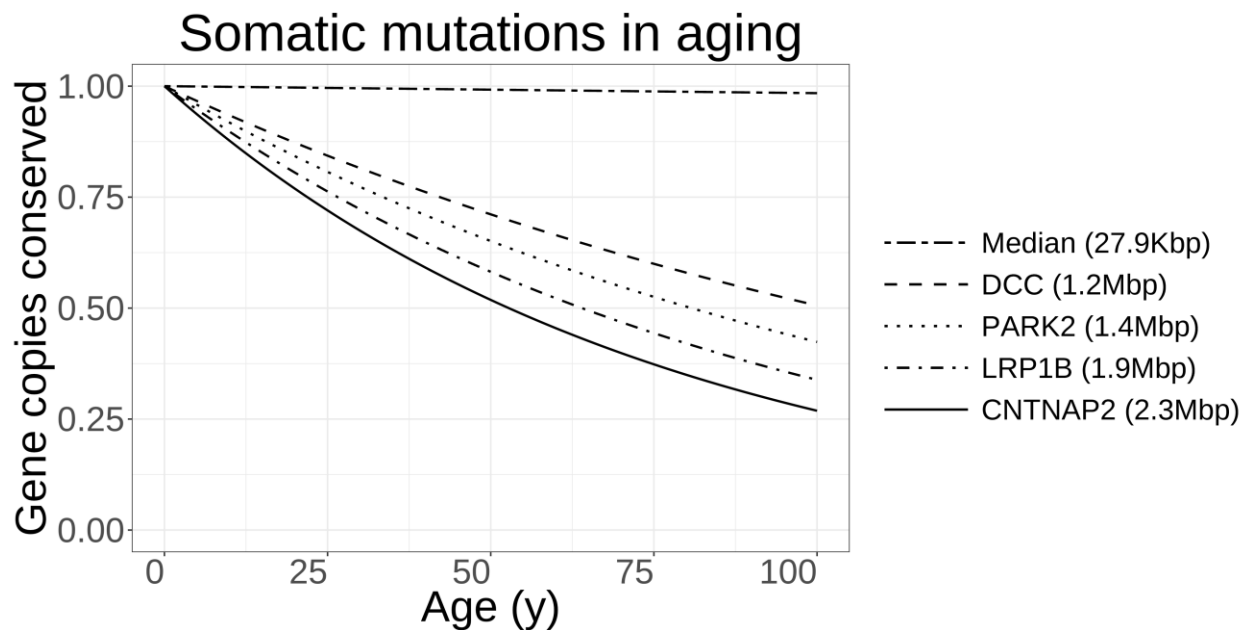

419

420 Figure 3. A binomial model in which somatic mutations take place at a fixed rate across the  
421 whole span of human genome has wildly different impacts on genes of various sizes. According  
422 to this model, a median-sized human gene mostly survives the mutational burden of aging, with  
423 only ~1 percent of its copies affected by any somatic mutation in late life. However, larger genes  
424 possess significantly shorter half-lives due to somatic mutations. Many of these large genes  
425 regulate synaptic function and integrity and are also known to act as tumor suppressors.

426

427 These clues compelled us to objectively investigate whether the largest human genes non-  
428 randomly take part in certain cellular mechanisms. We size-sorted all of the protein-coding  
429 human genes ( $n=18,181$  genes with UniProt accession). Thereafter, a minimum gene length  
430 threshold of  $>500\text{kb}$  was considered, a cut-off filter that resulted in inclusion of 234 genes  
431 representing the top 1.3 percent of largest protein-coding loci. Functional annotation and tissue  
432 expression profile of this gene set of interest were investigated using Database for Annotation,  
433 Visualization and Integrated Discovery (DAVID) and standard statistical tests of gene set  
434 enrichment<sup>210,211</sup>.

435 The most overrepresented organ for expression of this gene set was brain ( $p=2.1\times 10^{-17}$ ), followed  
436 by amygdala ( $p=1.9\times 10^{-4}$ ) and hippocampus ( $p=8.5\times 10^{-4}$ ). Showing strong enrichment statistics,  
437 *cell adhesion* (GO:0007155) was the most representative biological process related to this gene  
438 set ( $p=8.0\times 10^{-13}$ , Table 1) and the most overrepresented cellular component was *synapse*  
439 (GO:0045202:  $p=2.4\times 10^{-14}$ ). Other significant gene ontology terms further implicated pathways  
440 of nervous system development and function, including *neuron differentiation*, *axon*  
441 *morphogenesis*, *axon guidance*, *cell motion*, and *synaptic transmission* (Table 2).

442 The strongly nonrandom selectivity of large human genes to brain, synapse and cell adhesion is a  
443 potentially enlightening observation. We suspect that these genes may have fostered adhesion  
444 and assembly of complex synaptic circuits in cognitive evolution. As an evolutionary bottleneck,

445 extremely large genes may also be inherently costlier to be maintained in late life, and may put  
446 individuals at a neurobiological disadvantage when the burden of somatic mutations passes a  
447 critical threshold in aging. Remarkably, potential downside of large genes in late life aging has  
448 only been weakly corrected by evolutionary forces, since average human life expectancy passed  
449 the 40-year milestone only two centuries ago<sup>212</sup>. In this regard, AD may have unmasked a DNA  
450 maintenance and repair bottleneck in the elderly brain of modern humans due to the rapid  
451 expansion of life expectancy.

452 While somatic mutations provide a simple explanation for synaptic adhesion failure in aging, it is  
453 worth noting that extracellular adhesion pathways also form a surveillance system for continuous  
454 checking of cell anchorage in solid organs. Abnormal loss of cell adhesion robustly activates a  
455 specialized apoptosis program known as anoikis<sup>213</sup>, with a number of AD risk loci controlling  
456 such anoikis pathways including the reelin pathway which regulates anoikis of mesodermal  
457 cells<sup>214</sup> and the ephrin cascade of axon guidance which moderates anoikis in cancer<sup>215</sup>. Integrin is  
458 also a well-characterized regulator of anoikis cell death (e.g. see<sup>216</sup> and reviews<sup>217,218</sup>). The  
459 interrelationship between pathways of neurite adhesion and cell survival is at a level that they  
460 occasionally rely on dual-functioning *dependence* receptors, as has been determined for netrin  
461 and ephrin cascades of axon guidance<sup>219,220</sup>.

462



463 Table 1. Enrichment of large human genes (>500kbp) in *Gene ontology: biological process*  
464 annotation. p-values are corrected for multiple comparisons.

| <b>GO term: biological process</b>                               | <b>Gene count</b> | <b>Pvalue</b>         |
|------------------------------------------------------------------|-------------------|-----------------------|
| GO:0007155~cell adhesion                                         | 41                | 8.0×10 <sup>-13</sup> |
| GO:0022610~biological adhesion                                   | 41                | 4.0×10 <sup>-13</sup> |
| GO:0016337~cell-cell adhesion                                    | 23                | 3.0×10 <sup>-9</sup>  |
| GO:0019226~transmission of nerve impulse                         | 23                | 1.8×10 <sup>-7</sup>  |
| GO:0007268~synaptic transmission                                 | 21                | 2.8×10 <sup>-7</sup>  |
| GO:0030182~neuron differentiation                                | 25                | 3.9×10 <sup>-7</sup>  |
| GO:0048666~neuron development                                    | 22                | 3.8×10 <sup>-7</sup>  |
| GO:0030030~cell projection organization                          | 22                | 1.6×10 <sup>-6</sup>  |
| GO:0007156~homophilic cell adhesion                              | 14                | 1.6×10 <sup>-6</sup>  |
| GO:0048812~neuron projection morphogenesis                       | 17                | 1.7×10 <sup>-6</sup>  |
| GO:0031175~neuron projection development                         | 18                | 3.4×10 <sup>-6</sup>  |
| GO:0048667~cell morphogenesis involved in neuron differentiation | 16                | 7.4×10 <sup>-6</sup>  |
| GO:0048858~cell projection morphogenesis                         | 17                | 9.3×10 <sup>-6</sup>  |
| GO:0032990~cell part morphogenesis                               | 17                | 1.6×10 <sup>-5</sup>  |
| GO:0007409~axonogenesis                                          | 15                | 1.5×10 <sup>-5</sup>  |
| GO:0000904~cell morphogenesis involved in differentiation        | 16                | 4.2×10 <sup>-5</sup>  |
| GO:0007267~cell-cell signaling                                   | 24                | 1.8×10 <sup>-4</sup>  |
| GO:0000902~cell morphogenesis                                    | 18                | 2.2×10 <sup>-4</sup>  |
| GO:0007411~axon guidance                                         | 10                | 6.3×10 <sup>-4</sup>  |
| GO:0050808~synapse organization                                  | 8                 | 8.0×10 <sup>-4</sup>  |
| GO:0032989~cellular component morphogenesis                      | 18                | 7.6×10 <sup>-4</sup>  |
| GO:0050877~neurological system process                           | 31                | 0.011                 |
| GO:0006928~cell motion                                           | 17                | 0.021                 |
| GO:0006887~exocytosis                                            | 8                 | 0.036                 |

465

466

467 Table 2. Enrichment of large human genes (>500kbp) in *Gene ontology: cellular component*  
468 annotation. p-values are corrected for multiple comparisons.

| <b>GO term: cellular component</b> | <b>Gene count</b> | <b>Pvalue</b>         |
|------------------------------------|-------------------|-----------------------|
| GO:0045202~synapse                 | 33                | 2.4×10 <sup>-14</sup> |
| GO:0044456~synapse part            | 24                | 1.5×10 <sup>-10</sup> |
| GO:0030054~cell junction           | 31                | 7.8×10 <sup>-9</sup>  |
| GO:0005886~plasma membrane         | 97                | 1.1×10 <sup>-8</sup>  |
| GO:0045211~postsynaptic membrane   | 15                | 4.3×10 <sup>-7</sup>  |
| GO:0044459~plasma membrane part    | 63                | 3.8×10 <sup>-6</sup>  |
| GO:0043005~neuron projection       | 21                | 3.8×10 <sup>-6</sup>  |
| GO:0014069~postsynaptic density    | 10                | 2.2×10 <sup>-5</sup>  |
| GO:0042995~cell projection         | 29                | 2.3×10 <sup>-5</sup>  |
| GO:0042734~presynaptic membrane    | 7                 | 7.0×10 <sup>-5</sup>  |
| GO:0031224~intrinsic to membrane   | 110               | 1.1×10 <sup>-4</sup>  |
| GO:0016021~integral to membrane    | 103               | 1.5×10 <sup>-3</sup>  |
| GO:0044463~cell projection part    | 13                | 2.7×10 <sup>-3</sup>  |
| GO:0031225~anchored to membrane    | 12                | 5.8×10 <sup>-3</sup>  |
| GO:0019898~extrinsic to membrane   | 18                | 0.016                 |
| GO:0030424~axon                    | 9                 | 0.03                  |
| GO:0030425~dendrite                | 9                 | 0.03                  |

469

470

## 471 4 Predictions

472 AD patients may suffer faster accumulation of DNA damage and somatic mutations in their  
473 aging neurons due to a combination of heritable factors and environmental exposures. This insult  
474 eventually disrupts cellular pathways controlled by unstable genes of synaptic maintenance and  
475 neuronal survival. Derailed signaling of the APOE-lipoprotein receptor axis may be a prototypic  
476 feature of cellular dysfunction in sporadic AD (Fig. 4).

477

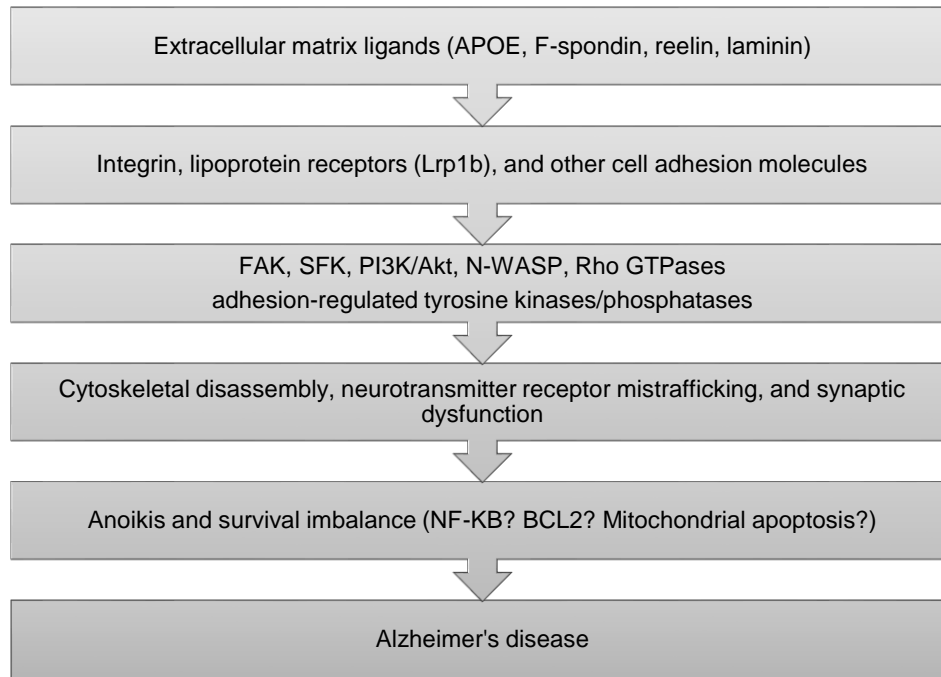

478

479 Figure 4. A simplified cascade of sporadic AD pathogenesis based on APOE signaling  
480 disruption. FAK: focal adhesion kinase; SFK: Src-family kinase.

481

482 We predict that mutational instability of the Lrp1b gene in human aging potentially explains the  
483 APOE4 risk factor of AD:

- 484 • Lrp1b is the largest member of the lipoprotein receptor family and represents the 8<sup>th</sup>  
485 largest human gene overall. Lrp1b is also one of the most frequently deleted genes in  
486 3,131 cancer specimens and maps to a common chromosomal fragile site<sup>223</sup>.
- 487 • Coding variants within Lrp1b are correlated with cognitive stability in aging and  
488 AD<sup>224,225</sup>.
- 489 • Lrp1b controls focal adhesion, cytoskeletal remodeling and cell migration<sup>226</sup>, pathways  
490 that functionally align with the genetic architecture of AD. Lrp1b has affinity to APOE  
491 particles and also interacts with APP at cell membranes, possibly acting as a co-receptor  
492 complex for cell signal transduction<sup>227,228</sup>.

- 493
- 494
- 495
- 496
- 497
- 498
- 499
- 500
- 501
- Lrp1b interacts with two postsynaptic proteins including PSD95<sup>134</sup> and PICK1<sup>229</sup>. PSD95 is the major synaptic scaffold protein and connects glutamate receptors with the synaptic actin cytoskeleton. PICK1 regulates postsynaptic function and glutamate receptor function<sup>230</sup>.
  - Unlike other APOE receptors that are generally expressed in various organs, Lrp1b demonstrates a restrictive pattern of brain expression<sup>227</sup>, and hippocampal CA1 neurons and amygdala show the highest Lrp1b transcription levels in the Allen human brain atlas<sup>231</sup> (Fig. 5).

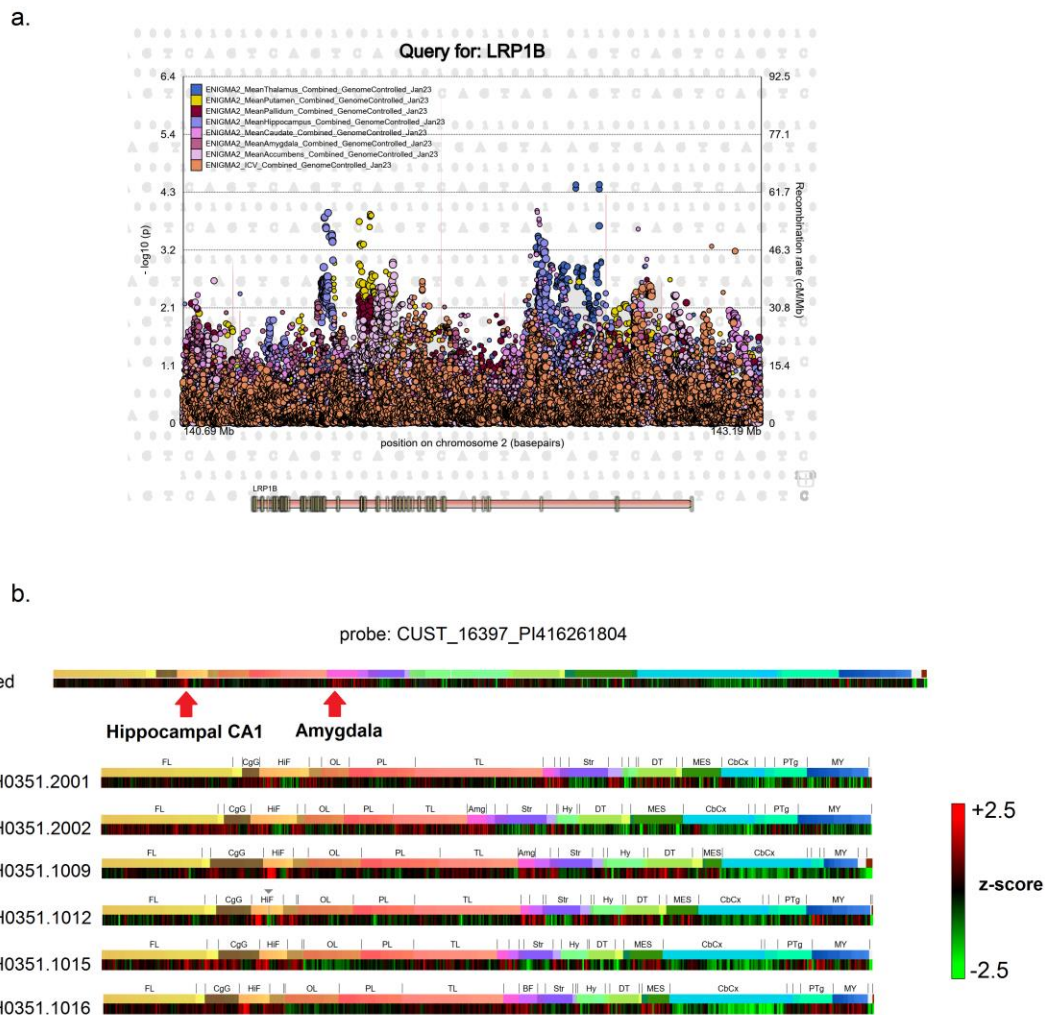

502

503 Figure 5. **Top:** Correlation of genetic polymorphisms of the *Lrp1b* locus with several MRI  
504 measures of brain volume in ENIGMA-2 meta-analysis<sup>232,233</sup> ([https://www.enigma-](https://www.enigma-brain.org/enigmavis/visualizer/visualizer)  
505 [brain.org/enigmavis/visualizer/visualizer](https://www.enigma-brain.org/enigmavis/visualizer/visualizer)). **Bottom:** Spatial expression of *Lrp1b* in different  
506 human brain regions in six postmortem brain samples, Allen human brain atlas  
507 (<http://human.brain-map.org>).

508

509 We predict that AD-type cognitive decline is correlated with somatic mutations in certain large  
510 synaptic genes including Lrp1b. Although previous models have already implicated oxidative  
511 stress and DNA damage in AD<sup>12,207,208,234</sup>, high-throughput results do not support an oxidative  
512 etiology for somatic mutations in various organs, since oxidative stress typically causes  
513 G:C→T:A transversions<sup>235,236</sup>, whereas aging cells demonstrate a clock-like signature of somatic  
514 mutations with enrichment of C:G→T:A transitions<sup>237,238</sup>. Intriguingly, the C:G→T:A fingerprint  
515 was recently observed as the dominant type of somatic mutations in neurons<sup>236,239,240</sup>. We predict  
516 that the most frequent type of genomic instability in AD may also be similar to that of “normal”  
517 aging in neurons and cancer cells. The reason for this preponderance of C:G→T:A transitions is  
518 currently unknown, and might reflect transcriptional stress, spontaneous cytosine deamination, or  
519 DNA repair failure<sup>236,241</sup>.

520 It is noteworthy that Lrp1b only serves to provide one example of vulnerable genes in brain  
521 aging, and the true genetic landscape of sporadic AD and senile neurodegenerations in general is  
522 not reducible to the APOE pathway (Fig. 6). In a manner that may be similar to engagement of  
523 various tumor suppressor genes in different cancers, brain-wide expression of several unstable  
524 synaptic genes may cause heterogeneity of dementia syndromes. For instance, the genetic  
525 architecture of Parkinson’s disease implicates many genes of the synaptic vesicular trafficking  
526 system including the extremely large tumor suppressor PARK2<sup>242</sup>, and the vulnerable  
527 dopaminergic neurons selectively express two known tumor-suppressor cell adhesion genes,  
528 including DCC<sup>243</sup> and AJAPI<sup>244</sup>.

529

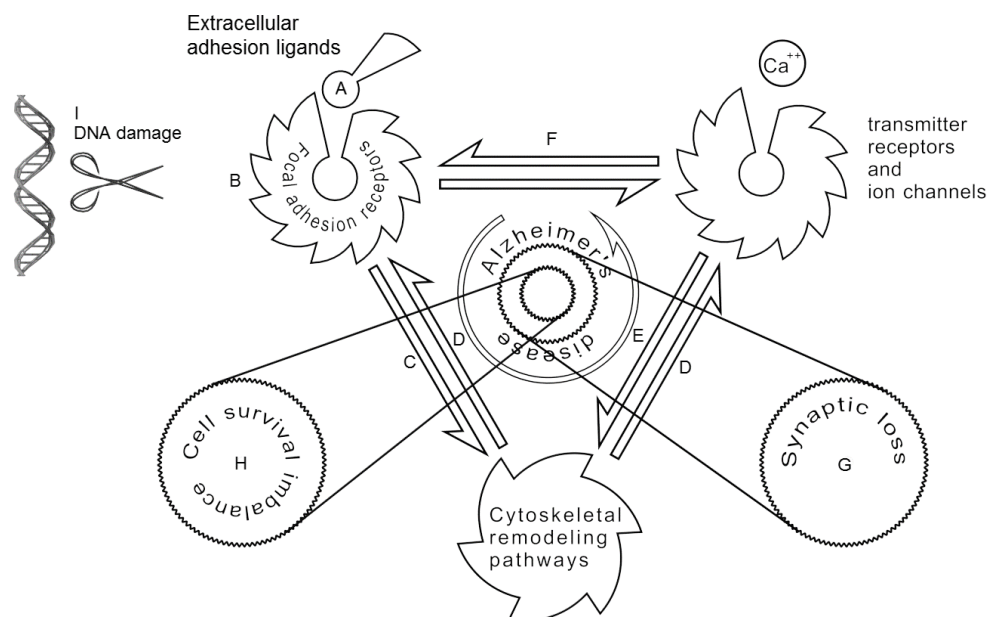

530

531 Figure 6. The proposed mechanisms of synaptic loss and neuronal death in AD. The extracellular  
532 matrix and its cell adhesion molecules (A) modulate neuronal adhesion receptors (B). Cell  
533 adhesion pathways affect remodeling of synaptic cytoskeleton as well as other modulators of

534 plasticity and neuronal survival, e.g. various SH3 domain containing proteins (C). The  
535 postsynaptic density scaffold is anchored with the synaptic actin cytoskeleton through linking  
536 proteins, e.g. PDZ domain containing proteins (D). Function and trafficking of the  
537 neurotransmitter receptors are controlled by cytoskeletal pathways (E) as well as cell adhesion  
538 molecules (F). Disruption of cell adhesion pathways in AD impairs synaptic stability and causes  
539 dendritic spine loss (G), and may eventually lead to neuronal survival imbalance by triggering  
540 anoikis-like mechanisms (H). Selective vulnerability of large genes in aging may be the cause of  
541 cell adhesion disruption in AD (I).

542

## 543 5 Future perspectives

544 Conditional knockout of Lrp1b as well as other modulators of the APOE signaling axis (F-  
545 spondin, reelin, Dab1) after completion of brain development may aid in modeling cognitive  
546 aspects of AD in laboratory animals. Intriguingly, conditional knockout of the Lrp1 gene which  
547 is closely related to Lrp1b, but lacks its brain-specific expression profile, results in  
548 neurodegenerative changes after 12 months of animal aging<sup>245</sup>. The single study of Lrp1b  
549 knockout mice did not follow the course of abnormal phenotypes past this age<sup>134</sup>. Lrp1 and  
550 Lrp1b may also be functionally redundant and partially compensate for loss of gene function in  
551 single knock-out models.

552 Since even the most aggressive forms of AD remain clinically-silent for decades, the short  
553 lifespan of laboratory animals may not permit effective interaction of genetic factors and  
554 environmental exposures to take place similar to human dementias. Therefore, accelerating the  
555 aging process by crossing AD animal models with DNA-repair defective strains<sup>246</sup> or exposure  
556 of models to genotoxic UV irradiation may prove informative, but usefulness of these  
557 gene×environment models relies on validation of DNA damage accumulation in aging human  
558 brain and its characteristics.

559 Our hypothesis is not based on any form of etiological relevance for A $\beta$  species or  
560 neurofibrillary tangles in the disease cascade, and redefines these neuropathological features as  
561 bystander epiphenomena downstream to other causal factors. For AD drug design, enhancing  
562 function of the integrin-lipoprotein receptor signaling axis and their downstream second  
563 messengers including adhesion-regulated tyrosine kinases (FAK/SFK, PI3K→Akt, and Erk) or  
564 regulators of cytoskeletal actin (e.g. Rho GTPases, cofilin, and WAVE) as well as blocking  
565 anoikis pathways may prove useful. Nevertheless, even the strongest AD risk locus, APOE, fails  
566 to explain ~94 percent of the disease variance alone, and single pathway therapeutic approaches  
567 may provide limited benefit in clinical trials. As a potentially more effective method, our model  
568 warrants engineering of novel gene delivery vehicles for restoring neuronal expression of  
569 unstable genes before somatic mutations reach a level that results in clinical presentation of  
570 dementia.

571 In conclusion, our proposal, the *large gene instability hypothesis*, implicates mutational  
572 vulnerability of the complex genes of synaptic adhesion and homeostasis as the primary etiology

573 of AD, and suggests a shift of paradigm from the protein aggregation process to DNA damage  
574 mechanisms for disease prevention and drug design.

## 575 **Acknowledgements**

576 S.S. is supported by NIH Big Data to Knowledge (BD2K) grant U54 EB20403.

577

## 578 **References**

- 579 1. Alzheimer A. Über einen eigenartigen schweren Erkrankungsprozeß der Hirnrinde.  
580 Neurologisches Centralblatt 1906;23:1129–113.
- 581 2. Glenner GG, Wong CW. Alzheimer's disease: initial report of the purification and  
582 characterization of a novel cerebrovascular amyloid protein. Biochem Biophys Res Commun  
583 1984;120:885-90.
- 584 3. Goate A, Chartier-Harlin M-C, Mullan M, et al. Segregation of a missense mutation in the  
585 amyloid precursor protein gene with familial Alzheimer's disease. Nature 1991;349:704-6.
- 586 4. Hardy JA, Higgins GA. Alzheimer's disease: the amyloid cascade hypothesis. Science  
587 1992;256:184.
- 588 5. Cummings JL, Morstorf T, Zhong K. Alzheimer's disease drug-development pipeline: few  
589 candidates, frequent failures. Alzheimer's Research & Therapy 2014;6:37.
- 590 6. Moreno-Treviño MG, Castillo-López J, Meester I. Moving Away from Amyloid Beta to Move on in  
591 Alzheimer Research. Frontiers in Aging Neuroscience 2015;7.
- 592 7. Josepha J, Shukitt-Hale B, Denisova NA, Martin A, Perry G, Smith MA. Copernicus revisited:  
593 amyloid beta in Alzheimer's disease. Neurobiology of aging 2001;22:131-46.
- 594 8. Castellani RJ, Smith MA. Compounding artefacts with uncertainty, and an amyloid cascade  
595 hypothesis that is 'too big to fail'. J Pathol 2011;224:147-52.
- 596 9. Morris GP, Clark IA, Vissel B. Inconsistencies and controversies surrounding the amyloid  
597 hypothesis of Alzheimer's disease. Acta Neuropathol Commun 2014;2:135.
- 598 10. Sorrentino P, Iuliano A, Polverino A, Jacini F, Sorrentino G. The dark sides of amyloid in  
599 Alzheimer's disease pathogenesis. FEBS Letters 2014;588:641-52.
- 600 11. Herrup K. The case for rejecting the amyloid cascade hypothesis. Nat Neurosci 2015:794-9.
- 601 12. Tse KH, Herrup K. Re-imagining Alzheimer's disease - the diminishing importance of amyloid and  
602 a glimpse of what lies ahead. J Neurochem 2017.
- 603 13. Reitz C. Alzheimer's disease and the amyloid cascade hypothesis: a critical review. Int J  
604 Alzheimers Dis 2012;2012:369808.
- 605 14. Reiman EM, Webster JA, Myers AJ, et al. GAB2 Alleles Modify Alzheimer's Risk in APOE ε4  
606 Carriers. Neuron 2007;54:713-20.
- 607 15. Bertram L, Lange C, Mullin K, et al. Genome-wide association analysis reveals putative  
608 Alzheimer's disease susceptibility loci in addition to APOE. The American Journal of Human Genetics  
609 2008;83:623-32.
- 610 16. Harold D, Abraham R, Hollingworth P, et al. Genome-wide association study identifies variants at  
611 CLU and PICALM associated with Alzheimer's disease. Nature genetics 2009;41:1088-93.
- 612 17. Seshadri S, Fitzpatrick AL, Ikram MA, et al. Genome-wide analysis of genetic loci associated with  
613 Alzheimer disease. Jama 2010;303:1832-40.
- 614 18. Lambert JC, Ibrahim-Verbaas CA, Harold D, et al. Meta-analysis of 74,046 individuals identifies  
615 11 new susceptibility loci for Alzheimer's disease. Nat Genet 2013;45:1452-8.

- 616 19. Jun GR, Chung J, Mez J, et al. Transethnic genome-wide scan identifies novel Alzheimer's disease  
617 loci. *Alzheimer's & dementia : the journal of the Alzheimer's Association* 2017.
- 618 20. Kang J, Lemaire H-G, Unterbeck A, et al. The precursor of Alzheimer's disease amyloid A4 protein  
619 resembles a cell-surface receptor. *Nature* 1987;325:733-6.
- 620 21. Ferreira A, Caceres A, Kosik K. Intraneuronal compartments of the amyloid precursor protein.  
621 *The Journal of Neuroscience* 1993;13:3112-23.
- 622 22. Koo EH, Park L, Selkoe DJ. Amyloid beta-protein as a substrate interacts with extracellular matrix  
623 to promote neurite outgrowth. *Proceedings of the National Academy of Sciences of the United States of*  
624 *America* 1993;90:4748-52.
- 625 23. Whitson JS, Glabe CG, Shintani E, Abcar A, Cotman CW.  $\beta$ -Amyloid protein promotes neuritic  
626 branching in hippocampal cultures. *Neuroscience Letters* 1990;110:319-24.
- 627 24. Kibbey MC, Jucker M, Weeks BS, Neve RL, Van Nostrand WE, Kleinman HK. beta-Amyloid  
628 precursor protein binds to the neurite-promoting IKVAV site of laminin. *Proc Natl Acad Sci U S A*  
629 1993;90:10150-3.
- 630 25. Breen KC. APP-collagen interaction is mediated by a heparin bridge mechanism. *Mol Chem*  
631 *Neuropathol* 1992;16:109-21.
- 632 26. Li X-F, Thinakaran G, Sisodia SS, Fu-Shin XY. Amyloid precursor-like protein 2 promotes cell  
633 migration toward fibronectin and collagen IV. *Journal of Biological Chemistry* 1999;274:27249-56.
- 634 27. Small DH, Nurcombe V, Reed G, et al. A heparin-binding domain in the amyloid protein  
635 precursor of Alzheimer's disease is involved in the regulation of neurite outgrowth. *Journal of*  
636 *Neuroscience* 1994;14:2117-27.
- 637 28. Qiu WQ, Ferreira A, Miller C, Koo EH, Selkoe DJ. Cell-surface beta-amyloid precursor protein  
638 stimulates neurite outgrowth of hippocampal neurons in an isoform-dependent manner. *The Journal of*  
639 *neuroscience : the official journal of the Society for Neuroscience* 1995;15:2157-67.
- 640 29. Allinquant B, Hantraye P, Maillieux P, Moya K, Bouillot C, Prochiantz A. Downregulation of  
641 amyloid precursor protein inhibits neurite outgrowth in vitro. *The Journal of cell biology* 1995;128:919-  
642 27.
- 643 30. Sosa LJ, Bergman J, Estrada-Bernal A, Glorioso TJ, Kittelson JM, Pfenninger KH. Amyloid  
644 precursor protein is an autonomous growth cone adhesion molecule engaged in contact guidance. *PLoS*  
645 *One* 2013;8:e64521.
- 646 31. Sosa LJ, Postma NL, Estrada-Bernal A, et al. Dosage of amyloid precursor protein affects axonal  
647 contact guidance in Down syndrome. *FASEB journal : official publication of the Federation of American*  
648 *Societies for Experimental Biology* 2014;28:195-205.
- 649 32. Song P, Pimplikar SW. Knockdown of Amyloid Precursor Protein in Zebrafish Causes Defects in  
650 Motor Axon Outgrowth. *PLoS ONE* 2012;7:e34209.
- 651 33. Lourenco FC, Galvan V, Fombonne J, et al. Netrin-1 interacts with amyloid precursor protein and  
652 regulates amyloid-beta production. *Cell death and differentiation* 2009;16:655-63.
- 653 34. Rama N, Goldschneider D, Corset V, Lambert J, Pays L, Mehlen P. Amyloid precursor protein  
654 regulates netrin-1-mediated commissural axon outgrowth. *The Journal of biological chemistry*  
655 2012;287:30014-23.
- 656 35. Hoe HS, Lee KJ, Carney RS, et al. Interaction of reelin with amyloid precursor protein promotes  
657 neurite outgrowth. *The Journal of neuroscience : the official journal of the Society for Neuroscience*  
658 2009;29:7459-73.
- 659 36. Young-Pearse TL, Chen AC, Chang R, Marquez C, Selkoe DJ. Secreted APP regulates the function  
660 of full-length APP in neurite outgrowth through interaction with integrin beta1. *Neural Dev* 2008;3:15.
- 661 37. Yamazaki T, Koo EH, Selkoe DJ. Cell surface amyloid  $\beta$ -protein precursor colocalizes with  $\beta$ 1  
662 integrins at substrate contact sites in neural cells. *The Journal of neuroscience* 1997;17:1004-10.



- 663 38. Sabo SL, Ikin AF, Buxbaum JD, Greengard P. The Alzheimer amyloid precursor protein (APP) and  
664 FE65, an APP-binding protein, regulate cell movement. *The Journal of cell biology* 2001;153:1403-14.
- 665 39. Young-Pearse TL, Chen AC, Chang R, Marquez C, Selkoe DJ. Secreted APP regulates the function  
666 of full-length APP in neurite outgrowth through interaction with integrin beta1. *Neural Development*  
667 2008;3:15-.
- 668 40. Lin L, Yan F, Zhao D, et al. Reelin promotes the adhesion and drug resistance of multiple  
669 myeloma cells via integrin beta1 signaling and STAT3. *Oncotarget* 2016;7:9844-58.
- 670 41. Dulabon L, Olson EC, Taglienti MG, et al. Reelin binds alpha3beta1 integrin and inhibits neuronal  
671 migration. *Neuron* 2000;27:33-44.
- 672 42. Schmid RS, Jo R, Shelton S, Kreidberg JA, Anton ES. Reelin, Integrin and Dab1 Interactions during  
673 Embryonic Cerebral Cortical Development. *Cerebral Cortex* 2005;15:1632-6.
- 674 43. Ramaker JM, Swanson TL, Copenhagen PF. Amyloid precursor proteins interact with the  
675 heterotrimeric G protein Go in the control of neuronal migration. *J Neurosci* 2013;33:10165-81.
- 676 44. Herms J, Anliker B, Heber S, et al. Cortical dysplasia resembling human type 2 lissencephaly in  
677 mice lacking all three APP family members. *The EMBO Journal* 2004;23:4106-15.
- 678 45. Rice HC, Townsend M, Bai J, et al. Pancortins interact with amyloid precursor protein and  
679 modulate cortical cell migration. *Development* 2012;139:3986-96.
- 680 46. Rice HC, Young-Pearse TL, Selkoe DJ. Systematic evaluation of candidate ligands regulating  
681 ectodomain shedding of amyloid precursor protein. *Biochemistry* 2013;52:3264-77.
- 682 47. Mathis C, Schröter A, Thallmair M, Schwab ME. Nogo-A Regulates Neural Precursor Migration in  
683 the Embryonic Mouse Cortex. *Cerebral Cortex (New York, NY)* 2010;20:2380-90.
- 684 48. Guan K-L, Rao Y. Signalling mechanisms mediating neuronal responses to guidance cues. *Nat Rev*  
685 *Neurosci* 2003;4:941-56.
- 686 49. Sabo SL, Ikin AF, Buxbaum JD, Greengard P. The amyloid precursor protein and its regulatory  
687 protein, FE65, in growth cones and synapses in vitro and in vivo. *The Journal of neuroscience : the*  
688 *official journal of the Society for Neuroscience* 2003;23:5407-15.
- 689 50. Müller T, Concannon CG, Ward MW, et al. Modulation of gene expression and cytoskeletal  
690 dynamics by the amyloid precursor protein intracellular domain (AICD). *Molecular biology of the cell*  
691 2007;18:201-10.
- 692 51. Young-Pearse TL, Suth S, Luth ES, Sawa A, Selkoe DJ. Biochemical and functional interaction of  
693 DISC1 and APP regulates neuronal migration during mammalian cortical development. *The Journal of*  
694 *neuroscience : the official journal of the Society for Neuroscience* 2010;30:10431-40.
- 695 52. Slomnicki LP, Lesniak W. A putative role of the Amyloid Precursor Protein Intracellular Domain  
696 (AICD) in transcription. *Acta Neurobiol Exp (Wars)* 2008;68:219-28.
- 697 53. Zhou D, Noviello C, D'Ambrosio C, Scaloni A, D'Adamio L. Growth Factor Receptor-bound Protein  
698 2 Interaction with the Tyrosine-phosphorylated Tail of Amyloid  $\beta$  Precursor Protein Is Mediated by Its Src  
699 Homology 2 Domain. *Journal of Biological Chemistry* 2004;279:25374-80.
- 700 54. Sun Y, Sun J, Lungchukiet P, et al. Fe65 Suppresses Breast Cancer Cell Migration and Invasion  
701 through Tip60 Mediated Cortactin Acetylation. *Scientific reports* 2015;5.
- 702 55. Zhou B, Liu L, Reddivari M, Zhang XA. The Palmitoylation of Metastasis Suppressor KAI1/CD82 Is  
703 Important for Its Motility- and Invasiveness-Inhibitory Activity. *Cancer Research* 2004;64:7455-63.
- 704 56. Liu WM, Zhang F, Moshiah S, et al. Tetraspanin CD82 inhibits protrusion and retraction in cell  
705 movement by attenuating the plasma membrane-dependent actin organization. *PLoS One*  
706 2012;7:e51797.
- 707 57. Steinecke A, Gampe C, Nitzsche F, Bolz J. DISC1 knockdown impairs the tangential migration of  
708 cortical interneurons by affecting the actin cytoskeleton. *Frontiers in cellular neuroscience* 2014;8:190.
- 709 58. Suetsugu S, Tezuka T, Morimura T, et al. Regulation of actin cytoskeleton by mDab1 through N-  
710 WASP and ubiquitination of mDab1. *Biochemical Journal* 2004;384:1-8.

- 711 59. Minami SS, Sung YM, Dumanis SB, et al. The cytoplasmic adaptor protein X11 $\alpha$  and extracellular  
712 matrix protein Reelin regulate ApoE receptor 2 trafficking and cell movement. *The FASEB Journal*  
713 2010;24:58-69.
- 714 60. Cheng SYS, Sun G, Schlaepfer DD, Pallen CJ. Grb2 Promotes Integrin-Induced Focal Adhesion  
715 Kinase (FAK) Autophosphorylation and Directs the Phosphorylation of Protein Tyrosine Phosphatase  $\alpha$   
716 by the Src-FAK Kinase Complex. *Molecular and cellular biology* 2014;34:348-61.
- 717 61. Giubellino A, Burke TR, Bottaro DP. Grb2 Signaling in Cell Motility and Cancer. *Expert opinion on*  
718 *therapeutic targets* 2008;12:1021-33.
- 719 62. Pandey P, Sliker B, Peters HL, et al. Amyloid precursor protein and amyloid precursor-like  
720 protein 2 in cancer. *Oncotarget* 2016;7:19430-44.
- 721 63. Pandey P, Rachagani S, Das S, et al. Amyloid precursor-like protein 2 (APLP2) affects the actin  
722 cytoskeleton and increases pancreatic cancer growth and metastasis. *Oncotarget* 2015;6:2064-75.
- 723 64. Wang PL, Niidome T, Akaike A, Kihara T, Sugimoto H. Rac1 inhibition negatively regulates  
724 transcriptional activity of the amyloid precursor protein gene. *Journal of neuroscience research*  
725 2009;87:2105-14.
- 726 65. Copenhaver PF, Ramaker JM. Neuronal migration during development and the amyloid  
727 precursor protein. *Current opinion in insect science* 2016;18:1-10.
- 728 66. Coulson E, Paliga K, Beyreuther K, Masters C. What the evolution of the amyloid protein  
729 precursor supergene family tells us about its function. *Neurochemistry international* 2000;36:175-84.
- 730 67. Shariati SAM, De Strooper B. Redundancy and divergence in the amyloid precursor protein  
731 family. *FEBS letters* 2013;587:2036-45.
- 732 68. Kavanaugh WM, Williams LT. An alternative to SH2 domains for binding tyrosine-phosphorylated  
733 proteins. *Science* 1994;266:1862-5.
- 734 69. Young-Pearse TL, Bai J, Chang R, Zheng JB, LoTurco JJ, Selkoe DJ. A critical function for beta-  
735 amyloid precursor protein in neuronal migration revealed by in utero RNA interference. *The Journal of*  
736 *neuroscience : the official journal of the Society for Neuroscience* 2007;27:14459-69.
- 737 70. Minami SS, Hoe H-S, Rebeck GW. Fyn kinase regulates the association between amyloid  
738 precursor protein and Dab1 by promoting their localization to detergent-resistant membranes. *Journal*  
739 *of neurochemistry* 2011;118:879-90.
- 740 71. Barbagallo APM, Wang Z, Zheng H, D'Adamio L. A Single Tyrosine Residue in the Amyloid  
741 Precursor Protein Intracellular Domain Is Essential for Developmental Function. *The Journal of biological*  
742 *chemistry* 2011;286:8717-21.
- 743 72. Reddy SS, Connor TE, Weeber EJ, Rebeck W. Similarities and differences in structure, expression,  
744 and functions of VLDLR and ApoER2. *Molecular Neurodegeneration* 2011;6:30-.
- 745 73. Del Turco D, Paul MH, Schlaudraff J, et al. Region-Specific Differences in Amyloid Precursor  
746 Protein Expression in the Mouse Hippocampus. *Frontiers in Molecular Neuroscience* 2016;9:134.
- 747 74. Cousins SL, Hoey SE, Anne Stephenson F, Perkinton MS. Amyloid precursor protein 695  
748 associates with assembled NR2A- and NR2B-containing NMDA receptors to result in the enhancement of  
749 their cell surface delivery. *Journal of neurochemistry* 2009;111:1501-13.
- 750 75. Hoe H-S, Fu Z, Makarova A, et al. The Effects of Amyloid Precursor Protein on Postsynaptic  
751 Composition and Activity. *The Journal of biological chemistry* 2009;284:8495-506.
- 752 76. Smirnova E, Shanbhag R, Kurabi A, Mobli M, Kwan JJ, Donaldson LW. Solution Structure and  
753 Peptide Binding of the PTB Domain from the AIDA1 Postsynaptic Signaling Scaffolding Protein. *PLOS ONE*  
754 2013;8:e65605.
- 755 77. Tindi JO, Chavez AE, Cvejic S, Calvo-Ochoa E, Castillo PE, Jordan BA. ANKS1B Gene Product AIDA-  
756 1 Controls Hippocampal Synaptic Transmission by Regulating GluN2B Subunit Localization. *J Neurosci*  
757 2015;35:8986-96.

- 758 78. Klevanski M, Saar M, Baumkotter F, Weyer SW, Kins S, Muller UC. Differential role of APP and  
759 APLPs for neuromuscular synaptic morphology and function. *Mol Cell Neurosci* 2014;61:201-10.
- 760 79. Mileusnic R, Lancashire CL, Johnston AN, Rose SP. APP is required during an early phase of  
761 memory formation. *The European journal of neuroscience* 2000;12:4487-95.
- 762 80. Tyan SH, Shih AY, Walsh JJ, et al. Amyloid precursor protein (APP) regulates synaptic structure  
763 and function. *Mol Cell Neurosci* 2012;51:43-52.
- 764 81. Dawson GR, Seabrook GR, Zheng H, et al. Age-related cognitive deficits, impaired long-term  
765 potentiation and reduction in synaptic marker density in mice lacking the beta-amyloid precursor  
766 protein. *Neuroscience* 1999;90:1-13.
- 767 82. Soba P, Eggert S, Wagner K, et al. Homo- and heterodimerization of APP family members  
768 promotes intercellular adhesion. *The EMBO Journal* 2005;24:3624-34.
- 769 83. Stahl R, Schilling S, Soba P, et al. Shedding of APP limits its synaptogenic activity and cell  
770 adhesion properties. *Frontiers in Cellular Neuroscience* 2014;8:410.
- 771 84. Munter L-M, Voigt P, Harmeier A, et al. GxxxG motifs within the amyloid precursor protein  
772 transmembrane sequence are critical for the etiology of A $\beta$ 42. *The EMBO Journal* 2007;26:1702-12.
- 773 85. Deyts C, Thinakaran G, Parent AT. APP Receptor? To Be or Not To Be. *Trends in Pharmacological*  
774 *Sciences*;37:390-411.
- 775 86. Swistowski A, Zhang Q, Orcholski ME, et al. Novel mediators of amyloid precursor protein  
776 signaling. *The Journal of neuroscience : the official journal of the Society for Neuroscience*  
777 2009;29:15703-12.
- 778 87. Hoe HS, Lee HK, Pak DT. The upside of APP at synapses. *CNS Neurosci Ther* 2012;18:47-56.
- 779 88. De Strooper B. Loss-of-function presenilin mutations in Alzheimer disease. *Talking Point on the*  
780 *role of presenilin mutations in Alzheimer disease. EMBO Reports* 2007;8:141-6.
- 781 89. Heilig EA, Xia W, Shen J, Kelleher RJ, 3rd. A presenilin-1 mutation identified in familial Alzheimer  
782 disease with cotton wool plaques causes a nearly complete loss of gamma-secretase activity. *The*  
783 *Journal of biological chemistry* 2010;285:22350-9.
- 784 90. Xia D, Kelleher RJ, 3rd, Shen J. Loss of Abeta43 Production Caused by Presenilin-1 Mutations in  
785 the Knockin Mouse Brain. *Neuron* 2016;90:417-22.
- 786 91. Xia D, Watanabe H, Wu B, et al. Presenilin-1 knockin mice reveal loss-of-function mechanism for  
787 familial Alzheimer's disease. *Neuron* 2015;85:967-81.
- 788 92. Doody RS, Raman R, Farlow M, et al. A Phase 3 Trial of Semagacestat for Treatment of  
789 Alzheimer's Disease. *New England Journal of Medicine* 2013;369:341-50.
- 790 93. Coric V, Salloway S, van Dyck CH, et al. Targeting Prodromal Alzheimer Disease With  
791 Avagacestat: A Randomized Clinical Trial. *JAMA neurology* 2015;72:1324-33.
- 792 94. Hemming ML, Elias JE, Gygi SP, Selkoe DJ. Proteomic Profiling of  $\gamma$ -Secretase Substrates and  
793 Mapping of Substrate Requirements. *PLoS Biol* 2008;6:e257.
- 794 95. Haapasalo A, Kovacs DM. The Many Substrates of Presenilin/ $\gamma$ -Secretase. *Journal of Alzheimer's*  
795 *Disease* 2011;25:3-28.
- 796 96. May P, Bock HH, Nimpf J, Herz J. Differential glycosylation regulates processing of lipoprotein  
797 receptors by gamma-secretase. *The Journal of biological chemistry* 2003;278:37386-92.
- 798 97. Wunderlich P, Glebov K, Kemmerling N, Tien NT, Neumann H, Walter J. Sequential proteolytic  
799 processing of the triggering receptor expressed on myeloid cells-2 (TREM2) protein by ectodomain  
800 shedding and gamma-secretase-dependent intramembranous cleavage. *The Journal of biological*  
801 *chemistry* 2013;288:33027-36.
- 802 98. Inoue E, Deguchi-Tawarada M, Togawa A, et al. Synaptic activity prompts gamma-secretase-  
803 mediated cleavage of EphA4 and dendritic spine formation. *J Cell Biol* 2009;185:551-64.

- 804 99. Guerreiro RJ, Lohmann E, Kinsella E, et al. Exome sequencing reveals an unexpected genetic  
805 cause of disease: NOTCH3 mutation in a Turkish family with Alzheimer's disease. *Neurobiol Aging*  
806 2012;33:1008.e17-23.
- 807 100. Groot AJ, Habets R, Yahyanejad S, et al. Regulated Proteolysis of NOTCH2 and NOTCH3  
808 Receptors by ADAM10 and Presenilins. *Molecular and cellular biology* 2014;34:2822-32.
- 809 101. Bai G, Chivatakarn O, Bonanomi D, et al. Presenilin-Dependent Receptor Processing Is Required  
810 for Axon Guidance. *Cell* 2011;144:106-18.
- 811 102. Waschbusch D, Born S, Niediek V, et al. Presenilin 1 affects focal adhesion site formation and cell  
812 force generation via c-Src transcriptional and posttranslational regulation. *The Journal of biological*  
813 *chemistry* 2009;284:10138-49.
- 814 103. Schedin-Weiss S, Caesar I, Winblad B, Blom H, Tjernberg LO. Super-resolution microscopy  
815 reveals  $\gamma$ -secretase at both sides of the neuronal synapse. *Acta Neuropathologica Communications*  
816 2016;4:29.
- 817 104. Restituto S, Khatri L, Ninan I, et al. Synaptic Autoregulation by Metalloproteases and  $\gamma$ -  
818 Secretase. *The Journal of neuroscience : the official journal of the Society for Neuroscience*  
819 2011;31:12083-93.
- 820 105. Marambaud P, Wen PH, Dutt A, et al. A CBP Binding Transcriptional Repressor Produced by the  
821 PS1/Cleavage of N-Cadherin Is Inhibited by PS1 FAD Mutations. *Cell*;114:635-45.
- 822 106. Ridge PG, Mukherjee S, Crane PK, Kauwe JSK, Alzheimer's Disease Genetics C. Alzheimer's  
823 Disease: Analyzing the Missing Heritability. *PLoS ONE* 2013;8:e79771.
- 824 107. Jonsson T, Atwal JK, Steinberg S, et al. A mutation in APP protects against Alzheimer's disease  
825 and age-related cognitive decline. *Nature* 2012;488:96-9.
- 826 108. Wang LS, Naj AC, Graham RR, et al. Rarity of the Alzheimer disease-protective APP A673T variant  
827 in the United States. *JAMA Neurol* 2015;72:209-16.
- 828 109. Zhou TB. Signaling pathways of apoE and its role of gene expression in glomerulus diseases. *J*  
829 *Recept Signal Transduct Res* 2013;33:73-8.
- 830 110. Lee GH, D'Arcangelo G. New Insights into Reelin-Mediated Signaling Pathways. *Frontiers in*  
831 *cellular neuroscience* 2016;10.
- 832 111. Del Rio JA, Heimrich B, Borrell V, et al. A role for Cajal-Retzius cells and reelin in the  
833 development of hippocampal connections. *Nature* 1997;385:70-4.
- 834 112. Wu P, Li MS, Yu DM, Deng JB. Reelin, a guidance signal for the regeneration of the entorhino-  
835 hippocampal path. *Brain research* 2008;1208:1-7.
- 836 113. Nathan BP, Jiang Y, Wong GK, Shen F, Brewer GJ, Struble RG. Apolipoprotein E4 inhibits, and  
837 apolipoprotein E3 promotes neurite outgrowth in cultured adult mouse cortical neurons through the  
838 low-density lipoprotein receptor-related protein. *Brain research* 2002;928:96-105.
- 839 114. Handelmann GE, Boyles JK, Weisgraber KH, Mahley RW, Pitas RE. Effects of apolipoprotein E,  
840 beta-very low density lipoproteins, and cholesterol on the extension of neurites by rabbit dorsal root  
841 ganglion neurons in vitro. *Journal of lipid research* 1992;33:1677-88.
- 842 115. Bellosta S, Nathan BP, Orth M, Dong L-M, Mahley RW, Pitas RE. Stable expression and secretion  
843 of apolipoproteins E3 and E4 in mouse neuroblastoma cells produces differential effects on neurite  
844 outgrowth. *Journal of Biological Chemistry* 1995;270:27063-71.
- 845 116. Huang Y. Abeta-independent roles of apolipoprotein E4 in the pathogenesis of Alzheimer's  
846 disease. *Trends Mol Med* 2010;16:287-94.
- 847 117. Hussain A, Luong M, Pooley A, Nathan BP. Isoform-specific effects of ApoE on neurite outgrowth  
848 in Olfactory Epithelium culture. *Journal of Biomedical Science* 2013;20:49-.
- 849 118. Chen X, Guo Z, Okoro EU, et al. Up-regulation of ATP Binding Cassette Transporter A1 Expression  
850 by Very Low Density Lipoprotein Receptor and Apolipoprotein E Receptor 2. *Journal of Biological*  
851 *Chemistry* 2012;287:3751-9.

- 852 119. Casey CS, Atagi Y, Yamazaki Y, et al. Apolipoprotein E Inhibits Cerebrovascular Pericyte Mobility  
853 through a RhoA Protein-mediated Pathway. *The Journal of biological chemistry* 2015;290:14208-17.
- 854 120. Comley LH, Fuller HR, Wishart TM, et al. ApoE isoform-specific regulation of regeneration in the  
855 peripheral nervous system. *Human molecular genetics* 2011;20:2406-21.
- 856 121. Kramer PL, Xu H, Woltjer RL, et al. Alzheimer Disease Pathology in Cognitively Healthy Elderly:A  
857 Genome-wide Study. *Neurobiology of aging* 2011;32:2113-22.
- 858 122. Sherva R, Tripodis Y, Bennett DA, et al. Genome-wide association study of the rate of cognitive  
859 decline in Alzheimer's disease. *Alzheimer's & dementia : the journal of the Alzheimer's Association*  
860 2014;10:45-52.
- 861 123. Jahanshad N, Rajagopalan P, Hua X, et al. Genome-wide scan of healthy human connectome  
862 discovers SPON1 gene variant influencing dementia severity. *Proceedings of the National Academy of*  
863 *Sciences* 2013;110:4768-73.
- 864 124. Woo W-M, Berry E, Hudson ML, Swale RE, Goncharov A, Chisholm AD. The *C. elegans* F-spondin  
865 family protein SPON-1 maintains cell adhesion in neural and non-neural tissues. *Development*  
866 (Cambridge, England) 2008;135:2747-56.
- 867 125. Hoe HS, Wessner D, Beffert U, Becker AG, Matsuoka Y, Rebeck GW. F-spondin interaction with  
868 the apolipoprotein E receptor ApoEr2 affects processing of amyloid precursor protein. *Mol Cell Biol*  
869 2005;25:9259-68.
- 870 126. Feinstein Y, Borrell V, Garcia C, et al. F-spondin and mindin: two structurally and functionally  
871 related genes expressed in the hippocampus that promote outgrowth of embryonic hippocampal  
872 neurons. *Development* 1999;126:3637-48.
- 873 127. Ho A, Südhof TC. Binding of F-spondin to amyloid- $\beta$  precursor protein: A candidate amyloid- $\beta$   
874 precursor protein ligand that modulates amyloid- $\beta$  precursor protein cleavage. *Proceedings of the*  
875 *National Academy of Sciences of the United States of America* 2004;101:2548-53.
- 876 128. Peterziel H, Sackmann T, Strelau J, et al. F-spondin regulates neuronal survival through  
877 activation of disabled-1 in the chicken ciliary ganglion. *Mol Cell Neurosci* 2011;46:483-97.
- 878 129. Rogava E, Meng Y, Lee JH, et al. The neuronal sortilin-related receptor SORL1 is genetically  
879 associated with Alzheimer disease. *Nature genetics* 2007;39:168-77.
- 880 130. Taira K, Bujo H, Hirayama S, et al. LR11, a mosaic LDL receptor family member, mediates the  
881 uptake of ApoE-rich lipoproteins in vitro. *Arteriosclerosis, thrombosis, and vascular biology*  
882 2001;21:1501-6.
- 883 131. Zhu Y, Bujo H, Yamazaki H, et al. LR11, an LDL receptor gene family member, is a novel regulator  
884 of smooth muscle cell migration. *Circulation research* 2004;94:752-8.
- 885 132. Leeb C, Eresheim C, Nimpf J. Clusterin is a ligand for apolipoprotein E receptor 2 (ApoER2) and  
886 very low density lipoprotein receptor (VLDLR) and signals via the Reelin-signaling pathway. *The Journal*  
887 *of biological chemistry* 2014;289:4161-72.
- 888 133. May P, Rohlmann A, Bock HH, et al. Neuronal LRP1 functionally associates with postsynaptic  
889 proteins and is required for normal motor function in mice. *Molecular and cellular biology*  
890 2004;24:8872-83.
- 891 134. Marschang P, Brich J, Weeber EJ, et al. Normal development and fertility of knockout mice  
892 lacking the tumor suppressor gene LRP1b suggest functional compensation by LRP1. *Molecular and*  
893 *cellular biology* 2004;24:3782-93.
- 894 135. Hoe HS, Pocivavsek A, Chakraborty G, et al. Apolipoprotein E receptor 2 interactions with the N-  
895 methyl-D-aspartate receptor. *The Journal of biological chemistry* 2006;281:3425-31.
- 896 136. Dumanis SB, Cha HJ, Song JM, et al. ApoE receptor 2 regulates synapse and dendritic spine  
897 formation. *PLoS One* 2011;6:e17203.
- 898 137. Weeber EJ, Beffert U, Jones C, et al. Reelin and ApoE receptors cooperate to enhance  
899 hippocampal synaptic plasticity and learning. *The Journal of biological chemistry* 2002;277:39944-52.

- 900 138. Qiu S, Zhao LF, Korwek KM, Weeber EJ. Differential reelin-induced enhancement of NMDA and  
901 AMPA receptor activity in the adult hippocampus. *The Journal of neuroscience : the official journal of*  
902 *the Society for Neuroscience* 2006;26:12943-55.
- 903 139. Chen Y, Durakoglugil MS, Xian X, Herz J. ApoE4 reduces glutamate receptor function and  
904 synaptic plasticity by selectively impairing ApoE receptor recycling. *Proceedings of the National*  
905 *Academy of Sciences of the United States of America* 2010;107:12011-6.
- 906 140. Klug W, Dietl A, Simon B, Sinning I, Wild K. Phosphorylation of LRP1 regulates the interaction  
907 with Fe65. *FEBS Lett* 2011;585:3229-35.
- 908 141. Kinoshita A, Shah T, Tangredi MM, Strickland DK, Hyman BT. The intracellular domain of the low  
909 density lipoprotein receptor-related protein modulates transactivation mediated by amyloid precursor  
910 protein and Fe65. *The Journal of biological chemistry* 2003;278:41182-8.
- 911 142. Giusti B, Margheri F, Rossi L, et al. Desmoglein-2-integrin Beta-8 interaction regulates actin  
912 assembly in endothelial cells: deregulation in systemic sclerosis. *PLoS One* 2013;8:e68117.
- 913 143. Peitsch WK, Doerflinger Y, Fischer-Colbrie R, et al. Desmoglein 2 Depletion Leads to Increased  
914 Migration and Upregulation of the Chemoattractant Secretoneurin in Melanoma Cells. *PLoS ONE*  
915 2014;9:e89491.
- 916 144. Carter N, Nakamoto T, Hirai H, Hunter T. EphrinA1-induced cytoskeletal re-organization requires  
917 FAK and p130cas. *Nature cell biology* 2002;4:565-73.
- 918 145. Yamazaki T, Masuda J, Omori T, Usui R, Akiyama H, Maru Y. EphA1 interacts with integrin-linked  
919 kinase and regulates cell morphology and motility. *J Cell Sci* 2009;122:243-55.
- 920 146. Dong Y, Wang J, Sheng Z, et al. Downregulation of EphA1 in colorectal carcinomas correlates  
921 with invasion and metastasis. *Modern Pathology* 2009;22:151-60.
- 922 147. Lambert JC, Grenier-Boley B, Harold D, et al. Genome-wide haplotype association study  
923 identifies the FRMD4A gene as a risk locus for Alzheimer's disease. *Mol Psychiatry* 2013;18:461-70.
- 924 148. Moleirinho S, Tilston-Lunel A, Angus L, Gunn-Moore F, Reynolds Paul A. The expanding family of  
925 FERM proteins. *Biochemical Journal* 2013;452:183-93.
- 926 149. Frame MC, Patel H, Serrels B, Lietha D, Eck MJ. The FERM domain: organizing the structure and  
927 function of FAK. *Nat Rev Mol Cell Biol* 2010;11:802-14.
- 928 150. Shen Z, Ye Y, Dong L, et al. Kindlin-2: a novel adhesion protein related to tumor invasion, lymph  
929 node metastasis, and patient outcome in gastric cancer. *The American Journal of Surgery* 2012;203:222-  
930 9.
- 931 151. Schjeide B-MM, Hooli B, Parkinson M, et al. GAB2 as an Alzheimer Disease Susceptibility Gene:  
932 Follow-up of Genomewide Association Results. *Archives of neurology* 2009;66:250-4.
- 933 152. Yu WM, Hawley TS, Hawley RG, Qu CK. Role of the docking protein Gab2 in beta(1)-integrin  
934 signaling pathway-mediated hematopoietic cell adhesion and migration. *Blood* 2002;99:2351-9.
- 935 153. Herrera Abreu MT, Hughes WE, Mele K, et al. Gab2 regulates cytoskeletal organization and  
936 migration of mammary epithelial cells by modulating RhoA activation. *Mol Biol Cell* 2011;22:105-16.
- 937 154. Singh MK, Dadke D, Nicolas E, et al. A novel Cas family member, HEPL, regulates FAK and cell  
938 spreading. *Mol Biol Cell* 2008;19:1627-36.
- 939 155. Huang Z, Yazdani U, Thompson-Peer KL, Kolodkin AL, Terman JR. Crk-associated substrate (Cas)  
940 signaling protein functions with integrins to specify axon guidance during development. *Development*  
941 2007;134:2337-47.
- 942 156. Guerrero MS, Parsons JT, Bouton AH. Cas and NEDD9 contribute to tumor progression through  
943 dynamic regulation of the cytoskeleton. *Genes & cancer* 2012;3:371-81.
- 944 157. Lehtonen S, Zhao F, Lehtonen E. CD2-associated protein directly interacts with the actin  
945 cytoskeleton. *American Journal of Physiology-Renal Physiology* 2002;283:F734-F43.
- 946 158. van Duijn TJ, Anthony EC, Hensbergen PJ, Deelder AM, Hordijk PL. Rac1 Recruits the Adapter  
947 Protein CMS/CD2AP to Cell-Cell Contacts. *The Journal of biological chemistry* 2010;285:20137-46.

- 948 159. Taniyama Y, Weber DS, Rocic P, et al. Pyk2-and Src-dependent tyrosine phosphorylation of PDK1  
949 regulates focal adhesions. *Molecular and cellular biology* 2003;23:8019-29.
- 950 160. Du Q-S, Ren X-R, Xie Y, Wang Q, Mei L, Xiong W-C. Inhibition of PYK2-induced actin cytoskeleton  
951 reorganization, PYK2 autophosphorylation and focal adhesion targeting by FAK. *Journal of Cell Science*  
952 2001;114:2977-87.
- 953 161. Cheung SMS, Ostergaard HL. Pyk2 Controls Integrin-Dependent CTL Migration through  
954 Regulation of De-Adhesion. *The Journal of Immunology* 2016.
- 955 162. Lipinski CA, Tran NL, Menashi E, et al. The tyrosine kinase pyk2 promotes migration and invasion  
956 of glioma cells. *Neoplasia* 2005;7:435-45.
- 957 163. Tebar F, Bohlander SK, Sorkin A. Clathrin assembly lymphoid myeloid leukemia (CALM) protein:  
958 localization in endocytic-coated pits, interactions with clathrin, and the impact of overexpression on  
959 clathrin-mediated traffic. *Molecular biology of the cell* 1999;10:2687-702.
- 960 164. Man HY, Lin JW, Ju WH, et al. Regulation of AMPA receptor-mediated synaptic transmission by  
961 clathrin-dependent receptor internalization. *Neuron* 2000;25:649-62.
- 962 165. Becker T, Ramirez A, Herold C, et al. COMPREHENSIVE GENE-GENE INTERACTION META-  
963 ANALYSIS OF IGAP GWA STUDIES. *Alzheimer's & Dementia: The Journal of the Alzheimer's*  
964 *Association*;10:P245.
- 965 166. Para A, Krischke M, Merlot S, et al. Dictyostelium Dock180-related RacGEFs Regulate the Actin  
966 Cytoskeleton during Cell Motility. *Molecular Biology of the Cell* 2009;20:699-707.
- 967 167. Maxwell MJ, Yuan Y, Anderson KE, Hibbs ML, Salem HH, Jackson SP. SHIP1 and Lyn Kinase  
968 Negatively Regulate Integrin alpha IIb beta 3 signaling in platelets. *The Journal of biological chemistry*  
969 2004;279:32196-204.
- 970 168. Mondal S, Subramanian KK, Sakai J, Bajrami B, Luo HR. Phosphoinositide lipid phosphatase SHIP1  
971 and PTEN coordinate to regulate cell migration and adhesion. *Mol Biol Cell* 2012;23:1219-30.
- 972 169. Yokoyama K, Tezuka T, Kotani M, et al. NYAP: a phosphoprotein family that links PI3K to WAVE1  
973 signalling in neurons. *The EMBO Journal* 2011;30:4739-54.
- 974 170. Shimoda Y, Koseki F, Itoh M, Toyoshima M, Watanabe K. A cis-complex of NB-2/contactin-5 with  
975 amyloid precursor-like protein 1 is localized on the presynaptic membrane. *Neuroscience letters*  
976 2012;510:148-53.
- 977 171. Wixler V, Laplantine E, Geerts D, et al. Identification of novel interaction partners for the  
978 conserved membrane proximal region of  $\alpha$ -integrin cytoplasmic domains. *FEBS Letters* 1999;445:351-5.
- 979 172. Messina S, Onofri F, Bongiorno-Borbone L, et al. Specific interactions of neuronal focal adhesion  
980 kinase isoforms with Src kinases and amphiphysin. *J Neurochem* 2003;84:253-65.
- 981 173. Mundigl O, Ochoa GC, David C, Slepnev VI, Kabanov A, De Camilli P. Amphiphysin I antisense  
982 oligonucleotides inhibit neurite outgrowth in cultured hippocampal neurons. *J Neurosci* 1998;18:93-103.
- 983 174. Yamada H, Padilla-Parra S, Park SJ, et al. Dynamic interaction of amphiphysin with N-WASP  
984 regulates actin assembly. *The Journal of biological chemistry* 2009;284:34244-56.
- 985 175. Wetzel-Smith MK, Hunkapiller J, Bhangale TR, et al. A rare mutation in UNC5C predisposes to  
986 late-onset Alzheimer's disease and increases neuronal cell death. *Nature medicine* 2014;20:1452-7.
- 987 176. Burgess RW, Jucius TJ, Ackerman SL. Motor axon guidance of the mammalian trochlear and  
988 phrenic nerves: dependence on the netrin receptor *Unc5c* and modifier loci. *Journal of Neuroscience*  
989 2006;26:5756-66.
- 990 177. Ly A, Nikolaev A, Suresh G, Zheng Y, Tessier-Lavigne M, Stein E. DSCAM is a netrin receptor that  
991 collaborates with DCC in mediating turning responses to netrin-1. *Cell* 2008;133:1241-54.
- 992 178. Stanco A, Szekeres C, Patel N, et al. Netrin-1- $\alpha$ 3 $\beta$ 1 integrin interactions regulate the migration  
993 of interneurons through the cortical marginal zone. *Proceedings of the National Academy of Sciences*  
994 2009;106:7595-600.

- 995 179. Carsberg CJ, Myers KA, Stern PL. Metastasis-associated 5T4 antigen disrupts cell-cell contacts  
996 and induces cellular motility in epithelial cells. *Int J Cancer* 1996;68:84-92.
- 997 180. He P, Jiang S, Ma M, et al. Trophoblast glycoprotein promotes pancreatic ductal  
998 adenocarcinoma cell metastasis through Wnt/planar cell polarity signaling. *Molecular medicine reports*  
999 2015;12:503-9.
- 1000 181. Murakami T, Abe H, Nagai K, et al. Trophoblast glycoprotein: possible candidate mediating  
1001 podocyte injuries in glomerulonephritis. *American journal of nephrology* 2010;32:505-21.
- 1002 182. Spencer HL, Eastham AM, Merry CLR, et al. E-Cadherin Inhibits Cell Surface Localization of the  
1003 Pro-Migratory 5T4 Oncofetal Antigen in Mouse Embryonic Stem Cells. *Molecular Biology of the Cell*  
1004 2007;18:2838-51.
- 1005 183. Su Y, Yang J, Besner GE. HB-EGF promotes intestinal restitution by affecting integrin–  
1006 extracellular matrix interactions and intercellular adhesions. *Growth factors* 2013;31:39-55.
- 1007 184. Su Y, Besner GE. HB-EGF Promotes Cell Migration and Adhesion via Focal Adhesion Kinase. *The*  
1008 *Journal of surgical research* 2014;189:222-31.
- 1009 185. Palamidessi A, Frittoli E, Ducano N, et al. The GTPase-activating protein RhoGAP2 controls focal  
1010 adhesion turnover and cell migration. *Current biology : CB* 2013;23:2355-64.
- 1011 186. Guerreiro R, Wojtas A, Bras J, et al. TREM2 Variants in Alzheimer's Disease. *New England*  
1012 *Journal of Medicine* 2013;368:117-27.
- 1013 187. Takegahara N, Takamatsu H, Toyofuku T, et al. Plexin-A1 and its interaction with DAP12 in  
1014 immune responses and bone homeostasis. *Nat Cell Biol* 2006;8:615-22.
- 1015 188. Ford JW, McVicar DW. TREM and TREM-like receptors in inflammation and disease. *Current*  
1016 *Opinion in Immunology* 2009;21:38-46.
- 1017 189. Barberis D, Artigiani S, Casazza A, et al. Plexin signaling hampers integrin-based adhesion,  
1018 leading to Rho-kinase independent cell rounding, and inhibiting lamellipodia extension and cell motility.  
1019 *The FASEB journal* 2004;18:592-4.
- 1020 190. Beecham GW, Vardarajan BN, Blue E, et al. WHOLE GENOME SEQUENCING IN FAMILIAL LATE-  
1021 ONSET ALZHEIMER'S DISEASE IDENTIFIES VARIATIONS IN TTC3 AND FSIP2. *Alzheimer's &*  
1022 *Dementia: The Journal of the Alzheimer's Association*;12:P197.
- 1023 191. Dey-Guha I, Alves CP, Yeh AC, et al. A MECHANISM FOR ASYMMETRIC CELL DIVISION RESULTING  
1024 IN PROLIFERATIVE ASYNCHRONICITY. *Molecular cancer research : MCR* 2015;13:223-30.
- 1025 192. Berto GE, Iobbi C, Camera P, et al. The DCR Protein TTC3 Affects Differentiation and Golgi  
1026 Compactness in Neurons through Specific Actin-Regulating Pathways. *PLOS ONE* 2014;9:e93721.
- 1027 193. Sims R, van der Lee SJ, Naj AC, et al. Rare coding variants in PLCG2, ABI3, and TREM2 implicate  
1028 microglial-mediated innate immunity in Alzheimer's disease. *Nature genetics* 2017.
- 1029 194. Tvorogov D, Wang X-J, Zent R, Carpenter G. Integrin-dependent PLC-γ1 phosphorylation  
1030 mediates fibronectin-dependent adhesion. *Journal of cell science* 2005;118:601-10.
- 1031 195. Mueller H, Stadtmann A, Van Aken H, et al. Tyrosine kinase Btk regulates E-selectin–mediated  
1032 integrin activation and neutrophil recruitment by controlling phospholipase C (PLC) γ2 and PI3Kγ  
1033 pathways. *Blood* 2010;115:3118-27.
- 1034 196. Sekino S, Kashiwagi Y, Kanazawa H, et al. The NESH/Abi-3-based WAVE2 complex is functionally  
1035 distinct from the Abi-1-based WAVE2 complex. *Cell Communication and Signaling* 2015;13:41.
- 1036 197. Hodgkinson CP, Naidoo V, Patti KG, et al. Abi3bp is a multifunctional autocrine/paracrine factor  
1037 that regulates mesenchymal stem cell biology. *Stem cells (Dayton, Ohio)* 2013;31:1669-82.
- 1038 198. Ichigotani Y, Yokozaki S, Fukuda Y, Hamaguchi M, Matsuda S. Forced expression of NESH  
1039 suppresses motility and metastatic dissemination of malignant cells. *Cancer research* 2002;62:2215-9.
- 1040 199. Hortsch M, Umemori H. *The sticky synapse*: Springer; 2009.
- 1041 200. Missler M, Sudhof TC, Biederer T. *Synaptic cell adhesion*. Cold Spring Harbor perspectives in  
1042 biology 2012;4:a005694.



- 1043 201. Lin B, Arai AC, Lynch G, Gall CM. Integrins regulate NMDA receptor-mediated synaptic currents.  
1044 *Journal of neurophysiology* 2003;89:2874-8.
- 1045 202. Juhász G, Vass G, Bozsó Z, Budai D, Penke B, Szegedi V. Integrin activation modulates NMDA and  
1046 AMPA receptor function of CA1 cells in a dose-related fashion in vivo. *Brain Research* 2008;1233:20-6.
- 1047 203. Shi Y, Ethell IM. Integrins Control Dendritic Spine Plasticity in Hippocampal Neurons through  
1048 NMDA Receptor and Ca<sup>2+</sup>/Calmodulin-Dependent Protein Kinase II-Mediated Actin Reorganization. *The*  
1049 *Journal of Neuroscience* 2006;26:1813-22.
- 1050 204. Myers JP, Santiago-Medina M, Gomez TM. Regulation of axonal outgrowth and pathfinding by  
1051 integrin-ECM interactions. *Developmental neurobiology* 2011;71:901-23.
- 1052 205. Kerrisk ME, Cingolani LA, Koleske AJ. ECM receptors in neuronal structure, synaptic plasticity,  
1053 and behavior. *Progress in brain research* 2014;214:101-31.
- 1054 206. Hoang ML, Kinde I, Tomasetti C, et al. Genome-wide quantification of rare somatic mutations in  
1055 normal human tissues using massively parallel sequencing. *Proceedings of the National Academy of*  
1056 *Sciences* 2016:201607794.
- 1057 207. Robison SH, Munzer JS, Tandan R, Bradley WG. Alzheimer's disease cells exhibit defective repair  
1058 of alkylating agent-induced DNA damage. *Annals of neurology* 1987;21:250-8.
- 1059 208. Anderson A, Su J, Cotman C. DNA damage and apoptosis in Alzheimer's disease: colocalization  
1060 with c-Jun immunoreactivity, relationship to brain area, and effect of postmortem delay. *The Journal of*  
1061 *Neuroscience* 1996;16:1710-9.
- 1062 209. Smith DI, Zhu Y, McAvoy S, Kuhn R. Common fragile sites, extremely large genes, neural  
1063 development and cancer. *Cancer letters* 2006;232:48-57.
- 1064 210. Consortium TU. The Universal Protein Resource (UniProt). *Nucleic acids research* 2008;36:D190-  
1065 D5.
- 1066 211. Huang da W, Sherman BT, Lempicki RA. Systematic and integrative analysis of large gene lists  
1067 using DAVID bioinformatics resources. *Nat Protoc* 2009;4:44-57.
- 1068 212. Rose MR, Mueller LD. Evolution of human lifespan: past, future, and present. *American journal*  
1069 *of human biology* 1998;10:409-20.
- 1070 213. Grossmann J. Molecular mechanisms of "detachment-induced apoptosis—Anoikis". *Apoptosis*  
1071 2002;7:247-60.
- 1072 214. Diaz-Mendoza MJ, Lorda-Diez CI, Montero JA, Garcia-Porrero JA, Hurle JM. Interdigital cell death  
1073 in the embryonic limb is associated with depletion of Reelin in the extracellular matrix. *Cell Death Dis*  
1074 2013;4:e800.
- 1075 215. Akada M, Harada K, Negishi M, Katoh H. EphB6 promotes anoikis by modulating EphA2  
1076 signaling. *Cell Signal* 2014;26:2879-84.
- 1077 216. Alanko J, Mai A, Jacquemet G, et al. Integrin endosomal signalling suppresses anoikis. *Nature cell*  
1078 *biology* 2015;17:1412-21.
- 1079 217. Frisch SM, Ruoslahti E. Integrins and anoikis. *Current opinion in cell biology* 1997;9:701-6.
- 1080 218. Vachon PH. Integrin Signaling, Cell Survival, and Anoikis: Distinctions, Differences, and  
1081 Differentiation. *Journal of Signal Transduction* 2011;2011:18.
- 1082 219. Mehlen P, Mazelin L. The dependence receptors DCC and UNC5H as a link between neuronal  
1083 guidance and survival. *Biology of the cell* 2003;95:425-36.
- 1084 220. Theus MH, Ricard J, Glass SJ, Travieso LG, Liebl DJ. EphrinB3 blocks EphB3 dependence receptor  
1085 functions to prevent cell death following traumatic brain injury. *Cell Death Dis* 2014;5:e1207.
- 1086 221. Kögel D, Schomburg R, Copanaki E, Prehn J. Regulation of gene expression by the amyloid  
1087 precursor protein: inhibition of the JNK/c-Jun pathway. *Cell death and differentiation* 2005;12:1.
- 1088 222. Müller T, Meyer HE, Egensperger R, Marcus K. The amyloid precursor protein intracellular  
1089 domain (AICD) as modulator of gene expression, apoptosis, and cytoskeletal dynamics—relevance for  
1090 Alzheimer's disease. *Progress in neurobiology* 2008;85:393-406.

- 1091 223. Beroukhim R, Mermel CH, Porter D, et al. The landscape of somatic copy-number alteration  
1092 across human cancers. *Nature* 2010;463:899-905.
- 1093 224. Shang Z, Lv H, Zhang M, et al. Genome-wide haplotype association study identify TNFRSF1A,  
1094 CASP7, LRP1B, CDH1 and TG genes associated with Alzheimer's disease in Caribbean Hispanic  
1095 individuals. *Oncotarget* 2015;6:42504.
- 1096 225. Poduslo S, Huang R, Spiro A. A genome screen of successful aging without cognitive decline  
1097 identifies LRP1B by haplotype analysis. *American Journal of Medical Genetics Part B: Neuropsychiatric*  
1098 *Genetics* 2010;153:114-9.
- 1099 226. Ni S, Hu J, Duan Y, et al. Down expression of LRP1B promotes cell migration via RhoA/Cdc42  
1100 pathway and actin cytoskeleton remodeling in renal cell cancer. *Cancer science* 2013;104:817-25.
- 1101 227. Haas J, Beer AG, Widschwendter P, et al. LRP1b shows restricted expression in human tissues  
1102 and binds to several extracellular ligands, including fibrinogen and apoE – carrying lipoproteins.  
1103 *Atherosclerosis* 2011;216:342-7.
- 1104 228. Cam JA, Zerbinatti CV, Knisely JM, Hecimovic S, Li Y, Bu G. The Low Density Lipoprotein  
1105 Receptor-related Protein 1B Retains  $\beta$ -Amyloid Precursor Protein at the Cell Surface and Reduces  
1106 Amyloid- $\beta$  Peptide Production. *Journal of Biological Chemistry* 2004;279:29639-46.
- 1107 229. Shiroshima T, Oka C, Kawaichi M. Identification of LRP1B-interacting proteins and inhibition of  
1108 protein kinase C $\alpha$ -phosphorylation of LRP1B by association with PICK1. *FEBS letters* 2009;583:43-8.
- 1109 230. Terashima A, Pelkey KA, Rah JC, et al. An essential role for PICK1 in NMDA receptor-dependent  
1110 bidirectional synaptic plasticity. *Neuron* 2008;57:872-82.
- 1111 231. Hawrylycz MJ, Lein S, Guillozet-Bongaarts AL, et al. An anatomically comprehensive atlas of the  
1112 adult human brain transcriptome. *Nature* 2012;489:391.
- 1113 232. Hibar DP, Stein JL, Renteria ME, et al. Common genetic variants influence human subcortical  
1114 brain structures. *Nature* 2015;520:224-9.
- 1115 233. Novak NM, Stein JL, Medland SE, Hibar DP, Thompson PM, Toga AW. EnigmaVis: online  
1116 interactive visualization of genome-wide association studies of the Enhancing NeuroImaging Genetics  
1117 through Meta-Analysis (ENIGMA) consortium. *Twin Res Hum Genet* 2012;15:414-8.
- 1118 234. Coppede F, Migliore L. DNA damage and repair in Alzheimer's disease. *Current Alzheimer*  
1119 *research* 2009;6:36-47.
- 1120 235. Itsara LS, Kennedy SR, Fox EJ, et al. Oxidative Stress Is Not a Major Contributor to Somatic  
1121 Mitochondrial DNA Mutations. *PLoS Genetics* 2014;10:e1003974.
- 1122 236. Lodato MA, Woodworth MB, Lee S, et al. Somatic mutation in single human neurons tracks  
1123 developmental and transcriptional history. *Science (New York, NY)* 2015;350:94-8.
- 1124 237. Alexandrov LB, Jones PH, Wedge DC, et al. Clock-like mutational processes in human somatic  
1125 cells. *Nature genetics* 2015;47:1402-7.
- 1126 238. Podolskiy DI, Lobanov AV, Kryukov GV, Gladyshev VN. Analysis of cancer genomes reveals basic  
1127 features of human aging and its role in cancer development. *Nature Communications* 2016;7.
- 1128 239. Busuttill RA, Garcia AM, Reddick RL, et al. Intra-organ variation in age-related mutation  
1129 accumulation in the mouse. *PLoS one* 2007;2:e876.
- 1130 240. Hazen JL, Faust GG, Rodriguez AR, et al. The Complete Genome Sequences, Unique Mutational  
1131 Spectra, and Developmental Potency of Adult Neurons Revealed by Cloning. *Neuron* 2016;89:1223-36.
- 1132 241. Tubbs A, Nussenzweig A. Endogenous DNA damage as a source of genomic instability in cancer.  
1133 *Cell* 2017;168:644-56.
- 1134 242. Zhang Y, Gao J, Chung KK, Huang H, Dawson VL, Dawson TM. Parkin functions as an E2-  
1135 dependent ubiquitin- protein ligase and promotes the degradation of the synaptic vesicle-associated  
1136 protein, CDCrel-1. *Proceedings of the National Academy of Sciences of the United States of America*  
1137 2000;97:13354-9.

- 1138 243. Osborne PB, Halliday GM, Cooper HM, Keast JR. Localization of immunoreactivity for deleted in  
1139 colorectal cancer (DCC), the receptor for the guidance factor netrin-1, in ventral tier dopamine  
1140 projection pathways in adult rodents. *Neuroscience* 2005;131:671-81.
- 1141 244. La Manno G, Gyllborg D, Codeluppi S, et al. Molecular Diversity of Midbrain Development in  
1142 Mouse, Human, and Stem Cells. *Cell* 2016;167:566-80.e19.
- 1143 245. Liu Q, Trotter J, Zhang J, et al. Neuronal LRP1 knockout in adult mice leads to impaired brain lipid  
1144 metabolism and progressive, age-dependent synapse loss and neurodegeneration. *The Journal of*  
1145 *neuroscience : the official journal of the Society for Neuroscience* 2010;30:17068-78.
- 1146 246. Jaarsma D, van der Pluijm I, de Waard MC, et al. Age-related neuronal degeneration:  
1147 complementary roles of nucleotide excision repair and transcription-coupled repair in preventing  
1148 neuropathology. *PLoS Genet* 2011;7:e1002405.
- 1149
